1 **Impact of biotic and abiotic factors on competitive interactions between**  
2 ***Pseudomonas aeruginosa* and *Staphylococcus aureus***

3

4

5

6

7 Selina Niggli,<sup>a</sup># Rolf Kümmerli<sup>a</sup>

8

9 <sup>a</sup> Department of Quantitative Biomedicine, University of Zürich, Winterthurerstrasse 190,  
10 8057 Zürich, Switzerland

11 # Address correspondence to Selina Niggli, [selina.niggli@uzh.ch](mailto:selina.niggli@uzh.ch)

12

13

14 **Running title:** How ecology affects competition between two pathogens

15 **Abstract**

16 Bacterial communities in the environment and in infections are typically diverse, yet we  
17 know little about the factors that determine interspecies interactions. Here, we apply  
18 concepts from ecological theory to understand how biotic and abiotic factors affect  
19 interaction patterns between the two opportunistic human pathogens  
20 *Pseudomonas aeruginosa* and *Staphylococcus aureus*, which often co-occur in  
21 polymicrobial infections. Specifically, we conducted a series of short- and long-term  
22 competition experiments between *P. aeruginosa* PAO1 (as our reference strain) and  
23 three different *S. aureus* strains (Cowan I, 6850, JE2) at three different starting  
24 frequencies and under three different environmental (culturing) conditions. We found  
25 that the competitive ability of *P. aeruginosa* strongly depended on the strain background  
26 of *S. aureus*, whereby *P. aeruginosa* dominated against Cowan I and 6850, but not  
27 against JE2. In the latter case, both species could end up as winners depending on  
28 conditions. Specifically, we observed strong frequency-dependent fitness patterns,  
29 including positive frequency dependence, where *P. aeruginosa* could dominate JE2 only  
30 when common, but not when rare. Finally, changes in environmental (culturing)  
31 conditions fundamentally altered the competitive balance between the two species, in a  
32 way that *P. aeruginosa* dominance increased when moving from shaken to static  
33 environments. Altogether, our results highlight that ecological details can have profound  
34 effects on the competitive dynamics between co-infecting pathogens, and determine  
35 whether two species can co-exist or invade each others' populations from rare.  
36 Moreover, our findings might parallel certain dynamics observed in chronic  
37 polymicrobial infections.

## 38 **Importance**

39 Bacterial infections are frequently caused by more than one species and such  
40 polymicrobial infections are often considered more virulent and more difficult to treat  
41 than the respective monospecies infections. *Pseudomonas aeruginosa* and  
42 *Staphylococcus aureus* are among the most important pathogens in polymicrobial  
43 infections and their co-occurrence is linked to worse disease outcome. There is great  
44 interest in understanding how these two species interact with each other and what the  
45 consequences for the host are. While previous studies have mainly looked at molecular  
46 mechanisms implicated in interactions between *P. aeruginosa* and *S. aureus*, here we  
47 show that ecological factors such as strain background, strain frequency and  
48 environmental conditions are important elements determining population dynamics and  
49 species co-existence patterns. We propose that the uncovered principles may also play  
50 major roles in infections, and therefore proclaim that an integrative approach combining  
51 molecular and ecological aspects is required to fully understand polymicrobial  
52 infections.

53

## 54 **Introduction**

55 Bacteria typically live in complex multi-species communities in the environment and  
56 associated with host organisms (1–3). The same holds true in the case of disease, as it  
57 is increasingly recognized that a majority of bacterial infections are polymicrobial,  
58 meaning that they are caused by more than one bacterial species (4, 5). There is great  
59 interest in understanding how bacteria interact and how interactions affect a community  
60 and the associated hosts (6–8). At the mechanistic level, a multitude of ways have been  
61 unraveled through which bacterial species can interact, with mechanisms including  
62 cross-feeding, quorum sensing-based signaling, toxin-mediated interference and  
63 physical interactions via contact-dependent systems (e.g. type VI secretion system) (9–  
64 11). In the context of disease, a key question is how interactions affect species  
65 successions in chronic infections and whether multispecies infections are more virulent  
66 and more difficult to treat than the respective monospecies infections, as it is commonly  
67 assumed (5, 12–14).

68  
69 Studying interactions between the two opportunistic human pathogens  
70 *Pseudomonas aeruginosa* (PA) and *Staphylococcus aureus* (SA) has emerged as a  
71 popular and relevant model system (15–17). The reason for this is that the two species  
72 often co-occur in infections, including cystic fibrosis (CF) lung and wound infections  
73 (18–20). Results from laboratory experiments suggest that PA is the superior species,  
74 suppressing growth of SA (21–23) and indeed, PA seems to be a well-equipped  
75 competitor. For example, it has been shown that 4-hydroxy-2-heptylquinoline N-oxide  
76 (HQNO) released by PA inhibits the electron transport chain of SA and induces the

77 formation of small colony variants (22, 24). Furthermore, the PA endopeptidase LasA is  
78 capable of lysing SA cells, a process that releases iron into the environment, potentially  
79 providing a direct benefit to PA (21, 25). Finally, we also know that PA can rapidly adapt  
80 to the presence of SA and improve its competitive abilities (26).

81

82 In this study, we follow a complementary approach to examine how biotic and abiotic  
83 ecological factors influence interactions between PA and SA. Previous work has  
84 primarily focused on the molecular mechanisms driving interactions between specific  
85 strain pairs under defined laboratory conditions. Here we hypothesize that not only  
86 molecular mechanisms, but also ecological factors will have a major impact on species  
87 interactions, particularly on community composition and temporal dynamics between  
88 species. To test our predictions, we used PA strain PAO1 as our focal strain and asked  
89 how (competitive) interactions with SA vary when manipulating: (1) the genetic  
90 background of SA; (2) the frequency of SA in competition with PA; and  
91 (3) environmental (culturing) conditions.

92

93 To vary the genetic background of SA, we competed PA against the three different SA  
94 strains Cowan I, 6850 and JE2. These strains fundamentally differ in several  
95 characteristics (Table 1). Cowan I is a methicillin-sensitive SA strain (MSSA), which is  
96 highly invasive towards host cells, non-cytotoxic and defective in the accessory gene  
97 regulator (*agr*) quorum-sensing system (27). 6850 is another MSSA strain, which is  
98 highly invasive, cytotoxic and haemolytic (28–30). Finally, JE2 is a methicillin-resistant  
99 (MRSA) USA300 strain, which is highly virulent, cytotoxic and hemolytic (31, 32). Given

100 the tremendous differences between these SA strains, we expect PA performance in  
101 competition with SA to vary substantially.

102

103 To manipulate strain frequency, we competed PA against SA at three different starting  
104 frequencies (1:9 ; 1:1 ; 9:1). Frequency-dependent fitness effects occur in many  
105 microbiological systems (33–36). A common pattern is that species enjoy relative fitness  
106 advantages when rare, but not when common (so-called negative frequency  
107 dependence), a phenomenon that can lead to stable co-existence of competitors. A  
108 rarer pattern is that species enjoy relative fitness advantages only when common in the  
109 population (so-called positive frequency dependence), meaning that initially rare  
110 species will not be able to invade an established population.

111

112 To manipulate environmental conditions, we changed simple parameters of our  
113 culturing conditions. First, we compared the performance of PA against SA strains in  
114 shaken liquid vs. viscous medium. Increased environmental viscosity has been shown  
115 to increase spatial structure, thereby decreasing strain interaction rates (37–39).  
116 Second, we compared the performance of PA against SA in shaken vs. static  
117 environments. While static conditions also reduce strain mixing, it further leads to a  
118 more heterogeneous environment characterized by gradients from the aerated air-liquid  
119 interface down to the microoxic bottom of a culture (40, 41).

120

121 In a first experiment, we assessed the growth performance of all strains in monoculture.  
122 Basic growth differences between strains could induce frequency shifts in co-cultures

123 even in the absence of direct interactions. We then performed high-throughput 24 hours  
124 batch culture competition experiments between PA and SA using a full-factorial design.  
125 All three species combinations were competed at all three starting frequencies under all  
126 three environmental conditions (see Figure 1 for an illustration of the workflow). Finally,  
127 we followed the temporal dynamics between PA and SA over five days to assess  
128 whether results from 24 hours competitions are predictive for more long-term dynamics  
129 between species and whether species coexistence is possible.

## 130 **Results**

### 131 **PA grows better than SA in monoculture**

132 We used tryptic soy broth (TSB) as the standard medium for all our assays. In this  
133 medium, we found that the number of doublings varied significantly among strains  
134 during a 24 hours growth cycle (ANOVA:  $F_{3,20} = 10.91$ ,  $P = 0.0002$ , Figure 2 and see  
135 Table S1 for the full statistical analysis). PA had the highest number of doublings ( $20.6$   
136  $\pm 0.65$ , mean  $\pm$  SD), followed by SA strains 6850 ( $18.9 \pm 1.14$ ), Cowan I ( $18.1 \pm 0.42$ )  
137 and JE2 ( $18.0 \pm 1.17$ ). While PA grew significantly better than all SA strains, the number  
138 of doublings did not differ between the three SA strains (TukeyHSD pairwise  
139 comparisons: Cowan I vs. 6850  $P_{\text{adj}} = 0.3717$ , 6850 vs. JE2  $P_{\text{adj}} = 0.3247$ , Cowan I vs.  
140 JE2  $P_{\text{adj}} = 0.9996$ ). Due to its moderate growth advantage, PA is expected to slightly  
141 increase in frequency in competition with SA strains, even in the absence of any direct  
142 species interactions.

143

### 144 **Genetic background, strain frequency and environmental factors all influence** 145 **competition outcomes**

146 The full-factorial design allowed us to simultaneously analyze the impact of SA strain  
147 genetic background, starting frequency, and culturing condition on the competitive  
148 outcomes between PA and SA strains. Our linear statistical model yielded a significant  
149 triple interaction between the three manipulated factors (strain genetic background,  
150 starting frequency and culturing condition; ANCOVA:  $F_{4,509} = 3.41$ ,  $P = 0.0091$ ). While  
151 this shows that all three manipulated factors influence the competitive outcomes  
152 between PA and SA in complex ways, the triple interaction makes it difficult to tease



153 apart the various effects. The statistical procedure for such cases is to split the model  
154 into sub-models. We followed this approach by first analyzing separate models for each  
155 of the three environmental conditions (shaken, viscous, static), and then split models  
156 according to SA strain background to test for differences between environmental  
157 conditions.

158

### 159 **The competitive ability of PA depends on the SA strain genetic background**

160 Under all three environmental conditions, we found that the relative fitness of PA  
161 significantly depended on the SA strain background (ANCOVA, shaken:  $F_{2,170} = 90.87$ ,  
162  $P < 0.0001$ ; viscous:  $F_{2,168} = 116.76$ ,  $P < 0.0001$ ; static:  $F_{2,170} = 56.52$ ,  $P < 0.0001$ ;  
163 Figure 3). Against Cowan I (Figure 3, column 1), we noted that PA consistently won the  
164 competitions across all starting frequencies and culturing conditions. SA strain 6850  
165 (Figure 3, column 2) turned out to be more competitive than Cowan I under shaken  
166 conditions ( $t_{176} = -6.74$ ,  $P < 0.0001$ ), while it lost similarly against PA under viscous and  
167 static conditions (viscous:  $t_{174} = 0.78$ ,  $P = 0.4350$ ; static:  $t_{176} = -1.99$ ,  $P = 0.0482$ ). In  
168 contrast, JE2 was the most competitive SA strain in our panel (Figure 3, column 3),  
169 performing significantly better than the other two SA strains under all conditions (see  
170 Table S2 for the full statistical analysis), and outcompeted PA under shaken and  
171 viscous conditions.

172

### 173 **The competitive ability of PA depends on its starting frequency in the population**

174 We found that the starting frequency of the two competitors had varying but always  
175 significant effects on the competitive ability of PA (ANCOVA, shaken:  $F_{1,170} = 52.81$ ,

176  $P < 0.0001$ ; viscous, interaction with strain background:  $F_{2,168} = 10.05$ ,  $P < 0.0001$ ;  
177 static:  $F_{1,170} = 162.32$ ,  $P < 0.0001$ ). Under shaken conditions (Figure 3, row 1), we  
178 observed that the relative fitness of PA increased when initially more common, thus  
179 following a positive frequency-dependent pattern. Under viscous conditions (Figure 3,  
180 row 2), the same positive frequency-dependent effect was only observed when PA  
181 competed with JE2. In competition with Cowan I or 6850, we noted that the relative  
182 fitness of PA peaked at intermediate starting frequencies. Under static conditions  
183 (Figure 3, row 3), we observed a pattern opposite to the one seen under shaken  
184 conditions for all strain pair combinations. The relative fitness of PA decreased when  
185 initially more common, thus following a negative frequency-dependent pattern (see  
186 Table S2 for the full statistical analysis).

187

### 188 **The competitive ability of PA is highest under static conditions**

189 Next, we compared the competitive outcomes among the different culturing conditions  
190 (shaken, viscous and static) for each strain combination separately. For all  
191 combinations, the culturing condition significantly affected competition outcomes  
192 (ANCOVA, Cowan I:  $F_{2,168} = 461.73$ ,  $P < 0.0001$ ; 6850:  $F_{2,167} = 428.16$ ,  $P < 0.0001$ ; JE2:  
193  $F_{2,168} = 199.95$ ,  $P < 0.0001$ ). In competition with all three SA strains, we found that the  
194 relative fitness of PA was significantly higher under static compared to shaken  
195 conditions (Cowan I:  $t_{174} = 19.99$ ,  $P < 0.0001$ ; 6850:  $t_{174} = 17.99$ ,  $P < 0.0001$ ; JE2:  $t_{174} =$   
196  $15.39$ ,  $P < 0.0001$ ). In contrast, there were no significant differences in the relative  
197 fitness of PA between shaken and viscous conditions for Cowan I ( $t_{174} = 0.91$ ,  $P =$   
198  $0.3644$ ) and JE2 ( $t_{174} = 0.82$ ,  $P = 0.4117$ ), while against 6850, PA was more competitive

199 under viscous than shaken conditions ( $t_{174} = 3.53$ ,  $P = 0.0005$ ) (see Table S2 for the full  
200 statistical analysis).

201

## 202 **Temporal dynamics between PA and SA**

203 In a next experiment, we competed PA and SA strains over five days under shaken  
204 conditions using the same three starting frequencies and by transferring cultures to  
205 fresh medium every 24 hours. The aim of this experiment was to follow the more long-  
206 term species dynamics and to assess whether stable coexistence between PA and SA  
207 can arise.

208

209 In competition with Cowan I, we found PA to be the dominant species (Figure 4a). It  
210 strongly increased in frequency already at day 1 under all starting frequencies and  
211 almost completely outcompeted Cowan I by day 3 (i.e., Cowan I remained below  
212 detection limit). Thus, we could not observe coexistence between PA and Cowan I. In  
213 competition with 6850, we observed similar population dynamics (Figure 4b). PA  
214 strongly increased in frequency from day 1 onwards at all starting frequencies and after  
215 three days, the bacterial populations almost entirely consisted of PA. Only in 10 out of  
216 30 populations, 6850 managed to persist at very low frequencies by day 5 (< 3% in nine  
217 cases, and 13% in one case). In competition with JE2, we found community trajectories  
218 that were strikingly different from the other two strain combinations (Figure 4c). First, we  
219 observed that JE2 was a strong competitor, keeping PA at bay in many populations  
220 during the first 24 hours of the experiment. Following day 1, community dynamics  
221 followed positive frequency-dependent patterns. In all populations with intermediate or

222 high PA starting frequencies, PA became the dominant species, and SA was recovered  
223 at low frequency in only a minority of populations by day 5 (3 out of 20 at < 10% of the  
224 population). In stark contrast, in populations where PA was initially rare, it did not  
225 increase in frequency, could not invade the SA populations and remained at a low  
226 frequency (< 10%) throughout the 5 days.

## 227 **Discussion**

228 *Pseudomonas aeruginosa* (PA) and *Staphylococcus aureus* (SA) frequently occur  
229 together in polymicrobial infections, where they cause severe host damage and lead to  
230 increased morbidity and mortality in patients (14, 42, 43). Consequently, there is high  
231 interest in understanding how PA and SA interact and how their interactions may  
232 influence disease outcome (12, 15). While most previous studies have focused on  
233 molecular aspects (44, 45), we here examined how a set of ecological factors affect  
234 competitive interactions between the two species. Our study, carried out in an *in vitro*  
235 batch culture system, revealed that: (i) the competitive ability of PA varied extensively  
236 as a function of the genetic background of SA; (ii) there were strong frequency-  
237 dependent fitness patterns, including positive-frequency dependent relationships where  
238 PA could only dominate a particular SA strain when common, but not when rare; and  
239 (iii) changes in environmental (culturing) conditions fundamentally affected the  
240 competitive balance between the two species. The key conclusion from our results is  
241 that ecology matters, and that variation in biotic and abiotic factors affect interactions  
242 between pathogenic bacterial species. This is most likely not only the case in *in vitro*  
243 systems, but also in the context of polymicrobial infections.

244  
245 PA has often been described as the dominant pathogen possibly displacing SA in  
246 infections (21, 46–48). Our results support this view, as PA dominated over SA under  
247 many conditions in 24 hours and 5-day competition experiments (Figures 3 and 4).  
248 However, PA did not always emerge as the winner and its success significantly varied in  
249 response to the genetic background of SA. Specifically, JE2 was the strongest

250 competitor, followed by 6850 and Cowan I. Our observation that all the three SA strains  
251 grow similarly in TSB (Figure 1) rules out the possibility that simple growth rate  
252 differences explain the variation in competitive abilities of SA strains (at least under  
253 shaken conditions). Instead, we found that the competitive ability of SA against PA  
254 correlated with their reported virulence level in infections (27, 29, 32). This could  
255 indicate that factors important for SA virulence (e.g. toxins or secreted enzymes) might  
256 also be involved in interactions with competitor bacteria. For JE2 and related USA300  
257 isolates, there are many genetic determinants known to be important for their success  
258 as opportunistic human pathogens (49). Among them are the cytotoxin Panton-  
259 Valentine leukocidin (PVL), the arginine catabolic mobile element (ACME) and the  
260 phenol soluble modulins (PSMs) (50). Interestingly, derivatives of PSMs have previously  
261 been shown to exhibit inhibitory activity against *Streptococcus pyogenes* (51). The  
262 authors of this work suggested that high production of PSMs might not only benefit SA  
263 in host colonization, but also in competition against coinfecting pathogens. Thus, it  
264 seems plausible that the USA300 derivative JE2 deploys a similar mechanism against  
265 PA in our competition experiments. Strain 6850 showed intermediate competitiveness  
266 against PA. As Cowan I, 6850 is a MSSA strain, but it is known to be more virulent than  
267 Cowan I and therefore likely produces certain substances that could also be important  
268 in competition with PA (27, 29). Conversely, Cowan I is known to have a nonfunctional  
269 accessory gene regulator (agr) quorum sensing system (27). The agr controls most  
270 virulence determinants in SA (52). If virulence determinants also play a role in  
271 interspecies competition, then this could explain why Cowan I turned out to be the least  
272 competitive SA strain against PA. One aim of our future work is to follow up this

273 mechanistic lead to explain differences in the competitive abilities of the different SA  
274 strains.

275

276 Another insight from our experiments is that the competitive ability of PA often  
277 depended on its starting frequency in the population, and that the type of frequency-  
278 dependent interactions (positive or negative) varied across environmental conditions  
279 (Figure 3). Under static conditions, we observed that the relative fitness of PA declined  
280 when more common in the population, but PA still won at all frequencies. This pattern is  
281 common for a highly dominant species that drives a competitor to extinction (53). Its  
282 decline in relative fitness simply reflects the fact that the room for further absolute  
283 frequency gains is reduced when a high frequency is already reached. In stark contrast,  
284 under shaken conditions, we found that the relative fitness of PA increased when it was  
285 more common in the population. Against Cowan I and 6850, this positive frequency-  
286 dependent fitness pattern did not affect the long-term community dynamics and PA won  
287 at all frequencies (Figure 4a+b). Against JE2, however, the 24 hours competition data  
288 suggest that, in most cases, PA cannot invade populations when initially rare and this is  
289 exactly what we observed in the long-term experiments: when its initial frequency was  
290 below 10%, PA did not increase in frequency, while it always fixed in the population or  
291 reached very high frequencies when initially occurring above 10%. There were two  
292 additional interesting observations with regards to PA-JE2 long-term dynamics. First,  
293 there were no major changes in PA frequency relative to JE2 during the first 24 hours  
294 (compatible with the competition assay data in Figure 3), and clear positive-frequency  
295 dependent patterns only emerged from 48 hours onwards. One possible explanation for

296 this pattern is that PA is initially naïve, but then senses and mounts a more competitive  
297 response over time (54). Second, one replicate (starting frequency 1:1) did not follow  
298 the above rules: PA continuously dropped in frequency until day 4 (11%) and then  
299 sharply increased to 93% on day 5. This frequency “zigzag” pattern is an indicator of  
300 antagonistic co-evolution (55), where the spread of a beneficial mutation in one species  
301 (SA) is followed by a counter-adaptation in the competing species (PA). It therefore  
302 seems that such evolutionary dynamics can already occur within relatively short periods  
303 of time.

304  
305 Our results further show that the competitive ability of PA is profoundly influenced by  
306 environmental (culturing) conditions (Figure 3). The largest differences arose between  
307 shaken and static culturing conditions with PA being most competitive in the latter  
308 environment. PA is known to be metabolically versatile, it is motile and grows well under  
309 microoxic conditions (56, 57). Static conditions introduce strong oxygen and nutrient  
310 gradients, and our results suggest that PA grows better under these conditions than SA.  
311 Furthermore, oxygen availability has previously been shown to influence interactions  
312 between PA and SA clinical isolates (58). With regard to medium viscosity, we initially  
313 hypothesized that increased spatial structure could temper competitive interactions and  
314 favor species co-existence, as competitors are spatially more segregated from each  
315 other (37, 59, 60). However, we found no support for this hypothesis as the competitive  
316 ability of PA did not differ between shaken and viscous environments. While the spatial  
317 structure, introduced through the addition of agar to the liquid growth medium, had  
318 significant effects on within-species social interactions in other study systems (53, 61), it



319 did not affect the between-species interactions in our setup. One reason might be that  
320 the degree of spatial structure introduced (0.2% agar in TSB) was simply not high  
321 enough to see an effect. This could especially be true if toxins were involved in  
322 mediating interactions – small molecules that can freely diffuse and target competitors  
323 that are not physically close-by.

324

325 We argue that our results, even though they stem from an *in vitro* system, have at least  
326 three important implications for our understanding of polymicrobial infections. First, we  
327 show that the biological details of the strain background matter and determine who is  
328 dominant in a co-infection and whether co-existence between species is possible. Thus,  
329 we need to be careful not to overinterpret interaction data from a single PA-SA strain  
330 pair and conclude that the specific details found apply to PA-SA interactions in general.  
331 Second, there might be strong order effects, such that the species that infects a host  
332 first cannot be invaded by a later arriving species. This scenario applied to the  
333 interactions between PA and SA strain JE2, which were both unable to invade  
334 populations of the other species from rare. Finally, local physiological conditions at the  
335 infection site, like the degree of spatial structure or oxygen supply, can shift the  
336 competitive balance between species. This suggests that infections at certain sites  
337 might be more prone than others to polymicrobial infections, or to experience ecological  
338 shifts from one pathogen to another. To sum up, we wish to reiterate our take home  
339 message that the ecology of interactions between pathogens should receive more  
340 attention and may explain so far unresolved aspects of polymicrobial infections.

## 341 **Materials and Methods**

### 342 **Bacterial strains, media and growth conditions**

343 We used the *Pseudomonas aeruginosa* (PA) strain PAO1 (62) as our PA reference  
344 strain and the *Staphylococcus aureus* (SA) strains Cowan I, 6850 and JE2 for all  
345 experiments (Table 1). To distinguish PA from SA strains, we used a variant of our PA  
346 strain PAO1, which constitutively expresses the green fluorescent protein, from a single-  
347 copy gene (*attTn7::ptac-gfp*), stably integrated in the chromosome (63, 64). We chose  
348 the rich laboratory medium tryptic soy broth (TSB, Becton Dickinson) for all our  
349 experiments, because it supports growth of all the strains used. For all experiments,  
350 bacterial overnight cultures were grown in 10 ml TSB in 50 ml falcon tubes for  
351  $\pm 16$  hours at 37 °C and 220 rpm with aeration. After centrifugation and removal of the  
352 supernatant, we washed bacterial cells using 10 ml 0.8% NaCl solution and adjusted  
353 the OD<sub>600</sub> (optical density at 600 nm) to obtain similar cell numbers per ml for each  
354 strain.

355

### 356 **Calculating number of doublings for each strain in monoculture**

357 To assess the number of doublings of each strain in monoculture, we grew our strains in  
358 TSB under shaken conditions (170 rpm) for 24 hours at 37 °C by using the same  
359 starting OD<sub>600</sub> as for the competition experiments (see below). We serially diluted cells  
360 at the start ( $t_0$ ) and after 24 hours ( $t_{24}$ ), and plated aliquots on TSB + 1.2% agar. The  
361 plates were incubated overnight at 37 °C and colony- forming units (CFUs) counted for  
362 both timepoints on the following day. We estimated the number of doublings (D) for  
363 each strain as  $D = (\ln(x_{24}/x_0))/\ln(2)$ , where  $x_0$  and  $x_{24}$  are the initial and the final CFU/ml,

364 respectively (23). We performed this experiment three times with two replicates per  
365 strain per experiment.

366

### 367 **Competition experiments**

368 To initiate competitions, we mixed PA and SA strain pairs at three different starting  
369 frequencies (1:9, 1:1, 9:1) from washed and OD<sub>600</sub>-adjusted overnight cultures (see  
370 above). Competitions occurred in 24-well plates filled with 1.5 ml TSB per well. The  
371 starting OD<sub>600</sub> of both mixed and monocultures was 10<sup>-5</sup>. Monocultures of each strain  
372 served as controls in each experiment. We incubated plates for 24 hours at 37 °C under  
373 three different culturing conditions: shaken (170 rpm), viscous (170 rpm with 0.2% agar  
374 in TSB) and static. Prior and after the 24 hours competition period, we estimated the  
375 actual strain frequencies for each replicate using flow cytometry. We performed four  
376 independent experiments each featuring five replicates for each strain/starting  
377 frequency/condition combination. A graphical representation of the competition workflow  
378 is provided in Figure 1.

379

380 To follow community dynamics over time, we set up competitions in the same way as  
381 described above. After the first 24 hours of competition, we diluted cultures 1:10,000  
382 into fresh TSB medium. This process was repeated for five consecutive days. Strain  
383 frequencies were assessed using flow cytometry prior and after each 24 hours  
384 competition cycle. We carried out two independent experiments for each strain pair and  
385 starting frequency combination with 5 replicates per strain pair and frequency.

386

## 387 **Flow cytometry to estimate relative species frequency**

388 We assessed the relative strain frequencies at the beginning and at the end of each  
389 competition using a BD LSR II Fortessa flow cytometer (flow cytometry facility,  
390 University of Zürich) and the FlowJo software (BD, Bioscience) for data analysis. As our  
391 PA strain expresses a constitutive gfp tag, PA cells could unambiguously be  
392 distinguished from the gfp-negative SA cells with a blue laser line (excitation at 488 nm)  
393 and the FITC channel (emission: mirror 505 longpass, filter 530/30) (see supplementary  
394 Figure 1). Cytometer Setup and Tracking settings of the instrument were used for each  
395 experiment and the threshold of particle detection was set to 200 V (lowest possible  
396 value). We diluted cultures appropriately in 1x phosphate buffered saline (PBS, Gibco,  
397 Thermo Fisher) and recorded 100,000 events with a low flow rate. The following  
398 controls were used for data acquisition in every experiment: 1) PBS blank samples (to  
399 estimate number of background counts of the flow cytometer), 2) untagged  
400 monocultures (negative fluorescence control, used to set a fluorescence threshold in  
401 FlowJo) and 3) constitutive gfp-expressing monocultures (positive fluorescence control,  
402 set to 100% gfp-positive cells). Using our fluorescence threshold, we extracted the  
403 percentage of gfp-positive cells for each sample and scaled these values to the positive  
404 fluorescence control. The resulting percentage corresponds to the frequency of PA  
405 present in the respective replicate. Initial and final strain frequencies were used to  
406 calculate the relative fitness ( $v$ ) of the focal strain PA as  $v = [a_t \times (1 - a_0)] / [a_0 \times (1 - a_t)]$ ,  
407 where  $a_0$  and  $a_t$  are the initial and final frequencies of PA, respectively (36). We ln-  
408 transformed all relative fitness values to obtain normally distributed residuals. Values of  
409  $\ln(v) > 0$  or  $\ln(v) < 0$  indicate whether the frequency of the focal strain PA increased (i.e.

410 PA won the competition) or decreased (i.e. PA lost competition) relative to its SA  
411 competitor.

412

413 We know from previous experiments in our laboratory that due to the gfp tag, our PA  
414 strain does have a slight fitness defect in competition with its untagged parental strain  
415 ( $\ln(v) = -0.358 \pm 0.13$ , mean  $\pm$  95% CI, see (53)). As we consistently used the same  
416 gfp-tagged PA strain for all experiments in this study, results are fully comparable  
417 among treatments.

418

419 To verify that flow cytometry counts correlate with CFUs, we serially diluted and plated  
420 initial and final strain frequencies from competitions performed under shaken conditions  
421 for all three strain combinations on TSB + 1.2% agar and compared the obtained CFUs  
422 with the flow cytometry counts obtained for the same samples. We found strong positive  
423 correlations for the strain frequency estimates between the two methods (see  
424 supplementary figure 2).

425

## 426 **Statistical analysis**

427 All statistical analyses were performed with R Studio version 3.6.1. We used analysis of  
428 variance (ANOVA) and Tukey's HSD to compare number of doublings in monocultures  
429 of PA and SA. To test whether the relative fitness of PA varies in response to the SA  
430 strain genetic background, starting frequency and culturing conditions, we first built a  
431 factorial analysis of co-variance (ANCOVA), with SA strain genetic background and  
432 culturing conditions as factors and the starting frequency as covariate. We further

433 included 'experimental block' as an additional factor to account for variation between  
434 experiments. This full model yielded a significant triple interaction between SA strain  
435 genetic background, starting frequency and culturing condition. We therefore split the  
436 full model into a set of ANCOVA sub-models, separated either by culturing condition  
437 (shaken, viscous, static) or by SA strain genetic background (Cowan I, 6850, JE2). For  
438 post-hoc pairwise comparisons between culturing conditions or SA strains in the sub-  
439 models, we removed 'experimental block' as additional factor from the model. To test  
440 whether PA relative fitness is significantly different from zero under a given  
441 strain/starting frequency/condition combination, we performed one sample t-tests and  
442 used the false discovery rate method to correct p-values for multiple comparisons (65).  
443 To compare strain frequencies obtained by flow cytometry with those obtained by  
444 plating (CFUs), we used Pearson correlation analysis. For all data sets, we consulted  
445 Q-Q plots and results from the Shapiro-Wilk test to ensure that our residuals were  
446 normally distributed. Summary tables for linear models and t-tests used to analyze  
447 Figures 2 and 3 can be found in the supplemental material (Tables 1-3).

448 **Conflict of Interest**

449 The authors declare no conflict of interest.

450

451 **Acknowledgements**

452 We thank Markus Huemer (University Hospital of Zürich) for providing *S. aureus* strains  
453 and the flow cytometry facility (University of Zürich) for technical support and  
454 maintenance of resources. This project has received funding from the European  
455 Research Council (ERC) under the European Union's Horizon 2020 research and  
456 innovation programme (grant agreement no. 681295) to RK. Illustration for Figure 1 was  
457 created using BioRender ([www.biorender.com](http://www.biorender.com)).

458

459 **Author contributions**

460 S.N. and R.K. designed research, S.N. performed research, S.N. and R.K. analysed  
461 data and wrote the paper.

## 462 References

- 463 1. Stubbendieck RM, Vargas-Bautista C, Straight PD. 2016. Bacterial communities:  
464 Interactions to scale. *Front Microbiol* 7:1–19.
- 465 2. Donaldson GP, Lee SM, Mazmanian SK. 2016. Gut biogeography of the bacterial  
466 microbiota. *Nat Rev Microbiol* 14:20–32.
- 467 3. Human Microbiome Project Consortium. 2012. Structure, function and diversity of  
468 the healthy human microbiome. *Nature* 486:207–214.
- 469 4. Brogden KA, Brogden KA, Guthmiller JM, Guthmiller JM, Taylor CE, Taylor CE,  
470 Guthmiller JM, Guthmiller JM. 2005. Human polymicrobial infections. *Lancet*  
471 365:253–255.
- 472 5. Peters BM, Jabra-Rizk MA, O'May GA, William Costerton J, Shirtliff ME. 2012.  
473 Polymicrobial interactions: Impact on pathogenesis and human disease. *Clin*  
474 *Microbiol Rev* 25:193–213.
- 475 6. Rogers GB, Hoffman LR, Carroll MP, Bruce KD. 2013. Interpreting infective  
476 microbiota: The importance of an ecological perspective. *Trends Microbiol*  
477 21:271–276.
- 478 7. De Vos MGJ, Zagorski M, McNally A, Bollenbach T. 2017. Interaction networks,  
479 ecological stability, and collective antibiotic tolerance in polymicrobial infections.  
480 *Proc Natl Acad Sci U S A* 114:10666–10671.
- 481 8. Rezzoagli C, Granato ET, Kümmerli R. 2020. Harnessing bacterial interactions to  
482 manage infections: A review on the opportunistic pathogen *Pseudomonas*  
483 *aeruginosa* as a case example. *J Med Microbiol* 69:147–161.
- 484 9. Short FL, Murdoch SL, Ryan RP. 2014. Polybacterial human disease: The ills of



- 485 social networking. *Trends Microbiol* 22:508–516.
- 486 10. Tashiro Y, Yawata Y, Toyofuku M, Uchiyama H, Nomura N. 2013. Interspecies  
487 interaction between *Pseudomonas aeruginosa* and other microorganisms.  
488 *Microbes Environ* 28:13–24.
- 489 11. Ryan RP, Dow JM. 2008. Diffusible signals and interspecies communication in  
490 bacteria. *Microbiology* 154:1845–1858.
- 491 12. Murray JL, Connell JL, Stacy A, Turner KH, Whiteley M. 2014. Mechanisms of  
492 Synergy in Polymicrobial Infections. *J Microbiol* 52:188–199.
- 493 13. Hubert D, Réglie-Poupet H, Sermet-Gaudelus I, Ferroni A, Le Bourgeois M,  
494 Burgel PR, Serreau R, Dusser D, Poyart C, Coste J. 2013. Association between  
495 *Staphylococcus aureus* alone or combined with *Pseudomonas aeruginosa* and  
496 the clinical condition of patients with cystic fibrosis. *J Cyst Fibros* 12:497–503.
- 497 14. Maliniak ML, Stecenko AA, McCarty NA. 2016. A longitudinal analysis of chronic  
498 MRSA and *Pseudomonas aeruginosa* co-infection in cystic fibrosis: A single-  
499 center study. *J Cyst Fibros* 15:350–356.
- 500 15. Limoli DH, Hoffman LR. 2019. Help, hinder, hide and harm: What can we learn  
501 from the interactions between *Pseudomonas aeruginosa* and *Staphylococcus*  
502 *aureus* during respiratory infections. *Thorax* 74:684–692.
- 503 16. Orazi G, Ruoff KL, O'Toole GA. 2019. *Pseudomonas aeruginosa* Increases the  
504 Sensitivity of Biofilm-Grown *Staphylococcus aureus* to Membrane-Targeting  
505 Antiseptics and Antibiotics . *MBio* 10:1–15.
- 506 17. Tognon M, Köhler T, Luscher A, Van Delden C. 2019. Transcriptional profiling of  
507 *Pseudomonas aeruginosa* and *Staphylococcus aureus* during *in vitro* co-culture.

- 508 BMC Genomics 20:1–15.
- 509 18. Cystic Fibrosis Trust. 2014. UK Cystic Fibrosis Registry Annual data report 2018.  
510 Registry.
- 511 19. Gjødsbøl K, Christensen JJ, Karlsmark T, Jørgensen B, Klein BM, Krogfelt KA.  
512 2006. Multiple bacterial species reside in chronic wounds: A longitudinal study. *Int*  
513 *Wound J* 3.
- 514 20. Malic S, Hill KE, Hayes A, Percival SL, Thomas DW, Williams DW. 2009.  
515 Detection and identification of specific bacteria in wound biofilms using peptide  
516 nucleic acid fluorescent in situ hybridization (PNA FISH). *Microbiology* 155:2603–  
517 2611.
- 518 21. Mashburn LM, Jett AM, Akins DR, Whiteley M. 2005. *Staphylococcus aureus*  
519 serves as an iron source for *Pseudomonas aeruginosa* during *in vivo* coculture. *J*  
520 *Bacteriol* 187:554–566.
- 521 22. Hoffman LR, Déziel E, D’Argenio DA, Lépine F, Emerson J, McNamara S, Gibson  
522 RL, Ramsey BW, Miller SI. 2006. Selection for *Staphylococcus aureus* small-  
523 colony variants due to growth in the presence of *Pseudomonas aeruginosa*. *Proc*  
524 *Natl Acad Sci U S A* 103:19890–19895.
- 525 23. Harrison F, Paul J, Massey RC, Buckling A. 2008. Interspecific competition and  
526 siderophore-mediated cooperation in *Pseudomonas aeruginosa*. *ISME J* 2:49–55.
- 527 24. Biswas L, Biswas R, Schlag M, Bertram R, Götz F. 2009. Small-colony variant  
528 selection as a survival strategy for *Staphylococcus aureus* in the presence of  
529 *Pseudomonas aeruginosa*. *Appl Environ Microbiol* 75:6910–6912.
- 530 25. Kessler E, Safrin M, Olson JC, Ohman DE. 1993. Secreted LasA of

- 531 *Pseudomonas aeruginosa* is a Staphylolytic Protease. J Biol Chem 268:7503–  
532 7508.
- 533 26. Tognon M, Köhler T, Gdaniec BG, Hao Y, Lam JS, Beaume M, Luscher A,  
534 Buckling A, Van Delden C. 2017. Co-evolution with *Staphylococcus aureus* leads  
535 to lipopolysaccharide alterations in *Pseudomonas aeruginosa*. ISME J 11:2233–  
536 2243.
- 537 27. Grundmeier M, Tuchscher L, Brück M, Viemann D, Roth J, Willscher E, Becker  
538 K, Peters G, Löffler B. 2010. Staphylococcal Strains Vary Greatly in Their Ability  
539 to Induce an Inflammatory Response in Endothelial Cells. J Infect Dis 201:871–  
540 880.
- 541 28. Vann JM, Proctor RA. 1987. Ingestion of *Staphylococcus aureus* by bovine  
542 endothelial cells results in time- and inoculum-dependent damage to endothelial  
543 cell monolayers. Infect Immun 55:2155–2163.
- 544 29. Haslinger-Löffler B, Kahl BC, Grundmeier M, Strangfeld K, Wagner B, Fischer U,  
545 Cheung AL, Peters G, Schulze-Osthoff K, Sinha B. 2005. Multiple virulence  
546 factors are required for *Staphylococcus aureus*-induced apoptosis in endothelial  
547 cells. Cell Microbiol 7:1087–1097.
- 548 30. Balwit JM, Langevelde P Van, Vann JM, Proctorn RA. 1994. Gentamicin-resistant  
549 menadione and hemin auxotrophic *Staphylococcus aureus* persist within cultured  
550 endothelial cells. J Infect Dis 170:1033–1037.
- 551 31. Nimmo GR. 2012. USA300 abroad: Global spread of a virulent strain of  
552 community-associated methicillin-resistant *Staphylococcus aureus*. Clin Microbiol  
553 Infect 18:725–734.

- 554 32. Thurlow LR, Joshi GS, Richardson AR. 2012. Virulence strategies of the dominant  
555 USA300 lineage of community-associated methicillin-resistant *Staphylococcus*  
556 *aureus* (CA-MRSA). FEMS Immunol Med Microbiol 65:5–22.
- 557 33. Rendueles O, Amherd M, Velicer GJ. 2015. Positively Frequency-Dependent  
558 Interference Competition Maintains Diversity and Pervades a Natural Population  
559 of Cooperative Microbes. Curr Biol 25:1673–1681.
- 560 34. Healey D, Axelrod K, Gore J. 2016. Negative frequency-dependent interactions  
561 can underlie phenotypic heterogeneity in a clonal microbial population. Mol Syst  
562 Biol 12:877.
- 563 35. Levin BR. 1988. Frequency-dependent selection in bacterial populations. Philos  
564 Trans R Soc Lond B Biol Sci 319:459–472.
- 565 36. Ross-Gillespie A, Gardner A, West SA, Griffin AS. 2007. Frequency dependence  
566 and cooperation: Theory and a test with bacteria. Am Nat 170:331–342.
- 567 37. Kerr B, Riley MA, Feldman MW, Bohannon BJM. 2002. Local dispersal promotes  
568 biodiversity in a real-life game of rock-paper-scissors. Nature 418:171–174.
- 569 38. Van Gestel J, Weissing FJ, Kuipers OP, Kovács ÁT. 2014. Density of founder  
570 cells affects spatial pattern formation and cooperation in *Bacillus subtilis* biofilms.  
571 ISME J 8:2069–2079.
- 572 39. Weigert M, Ross-Gillespie A, Leinweber A, Pessi G, Brown SP, Kümmerli R.  
573 2017. Manipulating virulence factor availability can have complex consequences  
574 for infections. Evol Appl 10:91–101.
- 575 40. Spiers AJ, Bohannon J, Gehrig SM, Rainey PB. 2003. Biofilm formation at the air-  
576 liquid interface by the *Pseudomonas fluorescens* SBW25 wrinkly spreader

- 577 requires an acetylated form of cellulose. *Mol Microbiol* 50:15–27.
- 578 41. Borer B, Tecon R, Or D. 2018. Spatial organization of bacterial populations in  
579 response to oxygen and carbon counter-gradients in pore networks. *Nat Commun*  
580 9.
- 581 42. Limoli DH, Yang J, Khansaheb MK, Helfman B, Peng L, Stecenko AA, Goldberg  
582 JB. 2016. *Staphylococcus aureus* and *Pseudomonas aeruginosa* co-infection is  
583 associated with cystic fibrosis-related diabetes and poor clinical outcomes. *Eur J*  
584 *Clin Microbiol Infect Dis* 35:947–953.
- 585 43. Serra R, Grande R, Butrico L, Rossi A, Settimio UF, Caroleo B, Amato B, Gallelli  
586 L, De Franciscis S. 2015. Chronic wound infections: The role of *Pseudomonas*  
587 *aeruginosa* and *Staphylococcus aureus*. *Expert Rev Anti Infect Ther* 13:605–613.
- 588 44. Hotterbeekx A, Kumar-Singh S, Goossens H, Malhotra-Kumar S. 2017. *In vivo*  
589 and *In vitro* interactions between *Pseudomonas aeruginosa* and *Staphylococcus*  
590 spp. *Front Cell Infect Microbiol* 7:1–13.
- 591 45. Nguyen AT, Oglesby-Sherrouse AG. 2016. Interactions between *Pseudomonas*  
592 *aeruginosa* and *Staphylococcus aureus* during co-cultivations and polymicrobial  
593 infections. *Appl Microbiol Biotechnol* 100:6141–6148.
- 594 46. Machan ZA, Pitt TL, White W, Watson D, Taylor GW, Cole PJ, Wilson R. 1991.  
595 Interaction between *Pseudomonas aeruginosa* and *Staphylococcus aureus*:  
596 Description of an anti-staphylococcal substance. *J Med Microbiol* 34:213–217.
- 597 47. Pernet E, Guillemot L, Burgel PR, Martin C, Lambeau G, Sermet-Gaudelus I,  
598 Sands D, Leduc D, Morand PC, Jeammet L, Chignard M, Wu Y, Touqui L. 2014.  
599 *Pseudomonas aeruginosa* eradicates *Staphylococcus aureus* by manipulating the

- 600 host immunity. *Nat Commun* 5:5105.
- 601 48. Filkins LM, O'Toole GA. 2015. Cystic Fibrosis Lung Infections: Polymicrobial,  
602 Complex, and Hard to Treat. *PLoS Pathog* 11:1–8.
- 603 49. Diep BA, Gill SR, Chang RF, Phan TH, Chen JH, Davidson MG, Lin F, Lin J,  
604 Carleton HA, Mongodin EF, Sensabaugh GF, Perdreau-Remington F. 2006.  
605 Complete genome sequence of USA300, an epidemic clone of community-  
606 acquired methicillin-resistant *Staphylococcus aureus*. *Lancet* 367:731–739.
- 607 50. Watkins RR, David MZ, Salata RA. 2012. Current concepts on the virulence  
608 mechanisms of methicillin-resistant *Staphylococcus aureus*. *J Med Microbiol*  
609 61:1179–1193.
- 610 51. Joo HS, Cheung GYC, Otto M. 2011. Antimicrobial activity of community-  
611 associated methicillin-resistant *Staphylococcus aureus* is caused by phenol-  
612 soluble modulin derivatives. *J Biol Chem* 286:8933–8940.
- 613 52. Cheung AL, Bayer AS, Zhang G, Gresham H, Xiong YQ. 2004. Regulation of  
614 virulence determinants in vitro and in vivo in *Staphylococcus aureus*. *FEMS*  
615 *Immunol Med Microbiol* 40:1–9.
- 616 53. Leinweber A, Inglis FR, Kümmerli R. 2017. Cheating fosters species co-existence  
617 in well-mixed bacterial communities. *ISME J* 11:1179–1188.
- 618 54. Cornforth DM, Foster KR. 2013. Competition sensing: The social side of bacterial  
619 stress responses. *Nat Rev Microbiol*.
- 620 55. Zhang QG, Buckling A, Ellis RJ, Godfray HCJ. 2009. Coevolution between  
621 cooperators and cheats in a microbial system. *Evolution (N Y)* 63:2248–2256.
- 622 56. Valot B, Guyeux C, Rolland JY, Mazouzi K, Bertrand X, Hocquet D. 2015. What it

- 623 takes to be a *Pseudomonas aeruginosa*? The core genome of the opportunistic  
624 pathogen updated. PLoS One 10:1–15.
- 625 57. Wolfgang MC, Kulasekara BR, Liang X, Boyd D, Wu K, Yang Q, Miyada CG, Lory  
626 S. 2003. Conservation of genome content and virulence determinants among  
627 clinical and environmental isolates of *Pseudomonas aeruginosa*. Proc Natl Acad  
628 Sci U S A 100:8484–8489.
- 629 58. Pallett R, Leslie LJ, Lambert PA, Milic I, Devitt A, Marshall LJ. 2019. Anaerobiosis  
630 influences virulence properties of *Pseudomonas aeruginosa* cystic fibrosis  
631 isolates and the interaction with *Staphylococcus aureus*. Sci Rep 9:1–18.
- 632 59. Hyun JK, Boedicker JQ, Jang WC, Ismagilov RF. 2008. Defined spatial structure  
633 stabilizes a synthetic multispecies bacterial community. Proc Natl Acad Sci U S A  
634 105:18188–18193.
- 635 60. Lowery NV, Ursell T. 2019. Structured environments fundamentally alter  
636 dynamics and stability of ecological communities. Proc Natl Acad Sci U S A  
637 116:379–388.
- 638 61. Refardt D, Bergmiller T, Kümmerli R. 2013. Altruism can evolve when relatedness  
639 is low: Evidence from bacteria committing suicide upon phage infection. Proc R  
640 Soc B Biol Sci 280.
- 641 62. Stover CK, Pham XQ, Erwin AL, Mizoguchi SD, Warrener P, Hickey MJ,  
642 Brinkman FSL, Hufnagle WO, Kowallk DJ, Lagrou M, Garber RL, Goltry L,  
643 Tolentino E, Westbrook-Wadman S, Yuan Y, Brody LL, Coulter SN, Folger KR,  
644 Kas A, Larbig K, Lim R, Smith K, Spencer D, Wong GKS, Wu Z, Paulsen IT,  
645 Relzer J, Saler MH, Hancock REW, Lory S, Olson M V. 2000. Complete genome

- 646 sequence of *Pseudomonas aeruginosa* PAO1, an opportunistic pathogen. Nature  
647 406:959–964.
- 648 63. Choi KH, DeShazer D, Schweizer HP. 2006. mini-Tn7 insertion in bacteria with  
649 multiple glmS-linked attTn7 sites: Example *Burkholderia mallei* ATCC 23344. Nat  
650 Protoc 1:162–169.
- 651 64. Rezzoagli C, Granato ET, Kümmerli R. 2019. In-vivo microscopy reveals the  
652 impact of *Pseudomonas aeruginosa* social interactions on host colonization. ISME  
653 J 488262.
- 654 65. Benjamini Y, Hochberg Y. 1995. Controlling the false discovery rate: a practical  
655 and powerful approach to multiple testing. J R Stat Soc Ser B 57:289–300.
- 656



657 **Figures**

658 **Table 1.** PA and SA strains used for this study.

| Strain name                                         | Origin                         | Description                                                         | Reference      |
|-----------------------------------------------------|--------------------------------|---------------------------------------------------------------------|----------------|
| <b><i>Pseudomonas aeruginosa</i></b><br><b>(PA)</b> |                                |                                                                     |                |
| PAO1::gfp                                           | Wound                          | Constitutive GFP expression from the chromosome (attTn7::Ptac-GFP). | Our laboratory |
| <b><i>Staphylococcus aureus</i></b><br><b>(SA)</b>  |                                |                                                                     |                |
| Cowan I                                             | Septic arthritis               | MSSA isolate. Highly invasive, but not cytotoxic. Agr-defective.    | ATCC 12598     |
| 6850                                                | Osteomyelitis                  | MSSA isolate. Highly invasive, cytotoxic and hemolytic.             | ATCC 53657     |
| JE2                                                 | Skin and soft tissue infection | USA300 CA-MRSA isolate. Highly virulent, cytotoxic and hemolytic.   | NARSA          |

659

660 CA-MRSA: Community-acquired methicillin-resistant *S. aureus*

661 MSSA: Methicillin-sensitive *S. aureus*

662 Agr: Accessory gene regulator

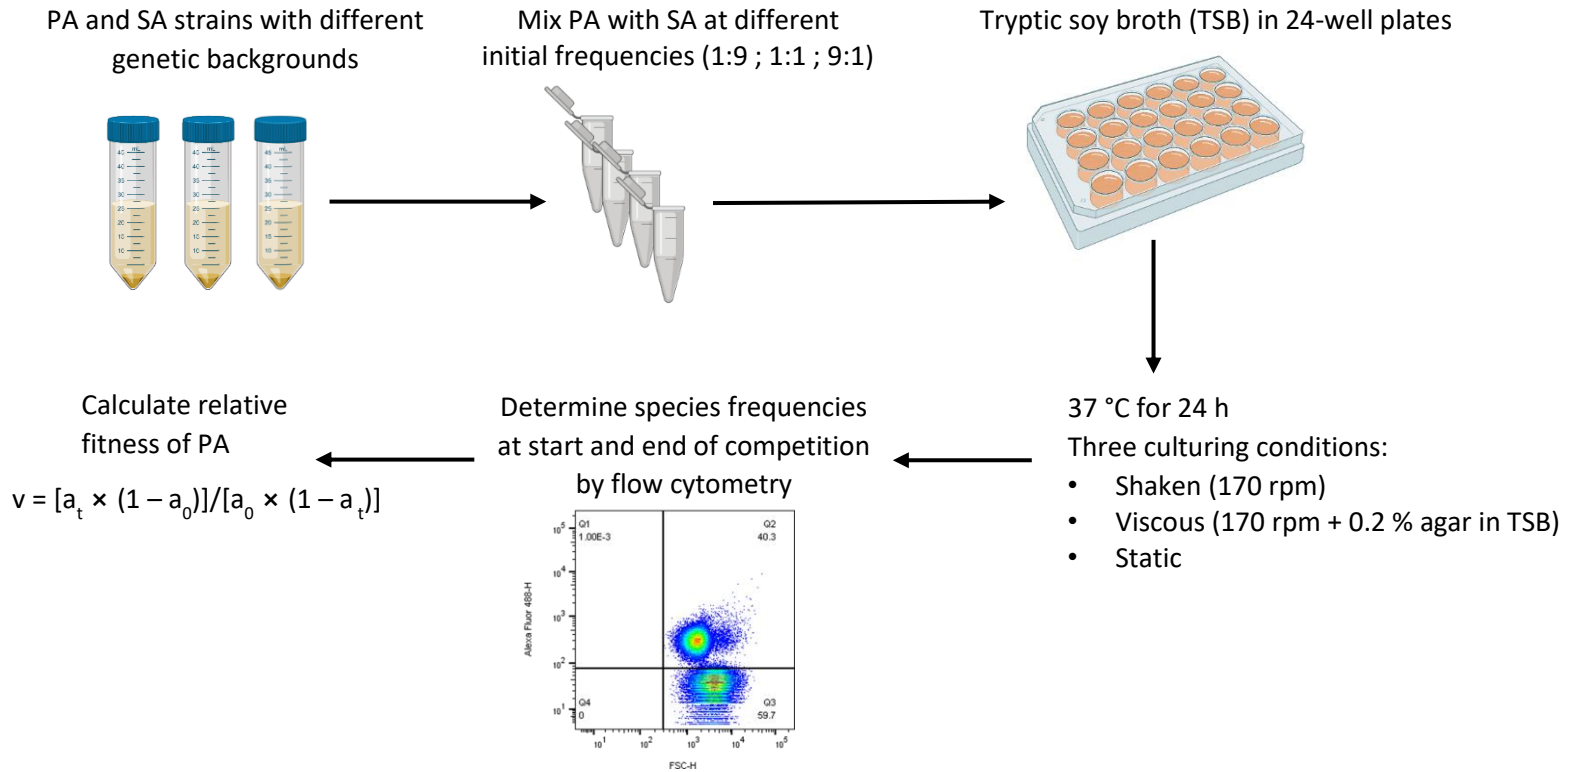

663 **Figure 1.** Workflow for the competition experiments. Bacterial overnight cultures were  
664 grown in 10 ml TSB in 50 ml falcon tubes for ~ 16 hours at 37 °C and 220 rpm with  
665 aeration. After washing and adjustment of OD<sub>600</sub> to obtain similar cell numbers for all  
666 strains, strain pairs (PA-Cowan I ; PA-6850 ; PA-JE2) were mixed at three different  
667 volumetric starting frequencies (1:9 ; 1:1 ; 9:1). Flow cytometry was used to measure  
668 the actual starting frequencies. Competitions were started with diluted cultures (OD<sub>600</sub> =  
669 10<sup>-5</sup>) in 24-well plates filled with 1.5 ml TSB per well. Plates were incubated for 24 hours  
670 at 37 °C under three different culturing conditions: shaken (170 rpm), viscous (170 rpm  
671 + 0.2% agar in TSB) and static. After the 24 hours competition period, final strain  
672 frequencies were measured for each replicate by flow cytometry. Using the initial and  
673 final strain frequencies, the relative fitness ( $v$ ) of the focal strain PA was calculated as  
674  $v = [a_t \times (1 - a_0)] / [a_0 \times (1 - a_t)]$ , where  $a_0$  and  $a_t$  are the initial and final frequencies of PA,  
675 respectively.

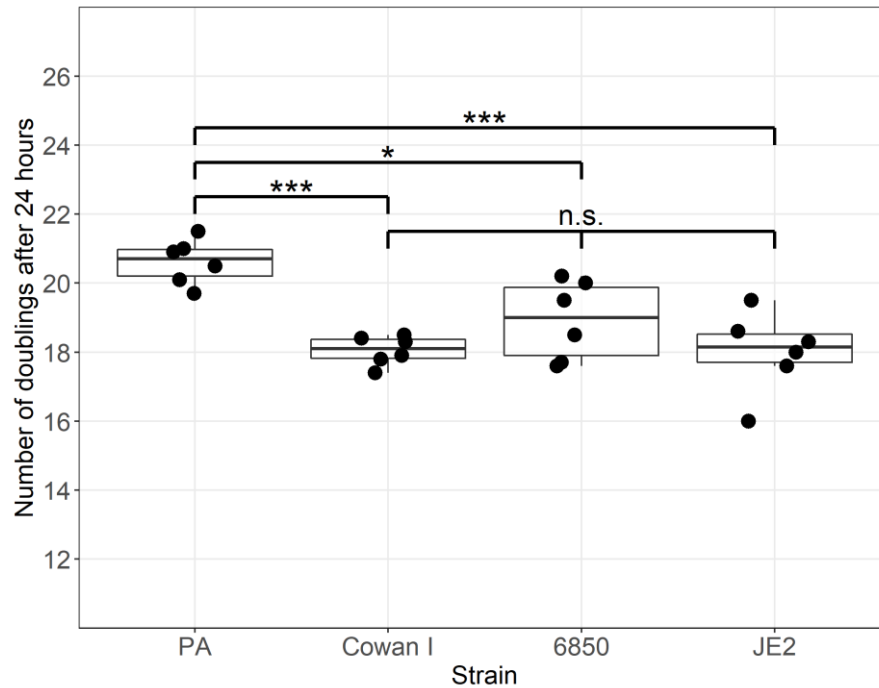

676

677 **Figure 2.** The number of doublings in monoculture is higher for *P. aeruginosa* PAO1  
678 (PA) than for the three *S. aureus* strains (Cowan I, 6850, JE2). Strains were grown as  
679 monocultures in TSB for 24 hours at 37 °C under shaken conditions using the same  
680 starting OD<sub>600</sub> as for the competition experiments. The box plots show the median (bold  
681 line) with the first and the third quartiles. The whiskers cover the 1.5\* inter-quartile range  
682 (IQR) or extend from the lowest to the highest value if they fall within the 1.5\* IQR. Data  
683 is from three independent experiments with six replicates in total. n.s. = not significant, \*  
684  $p < 0.05$ , \*\*\*  $p < 0.001$ .

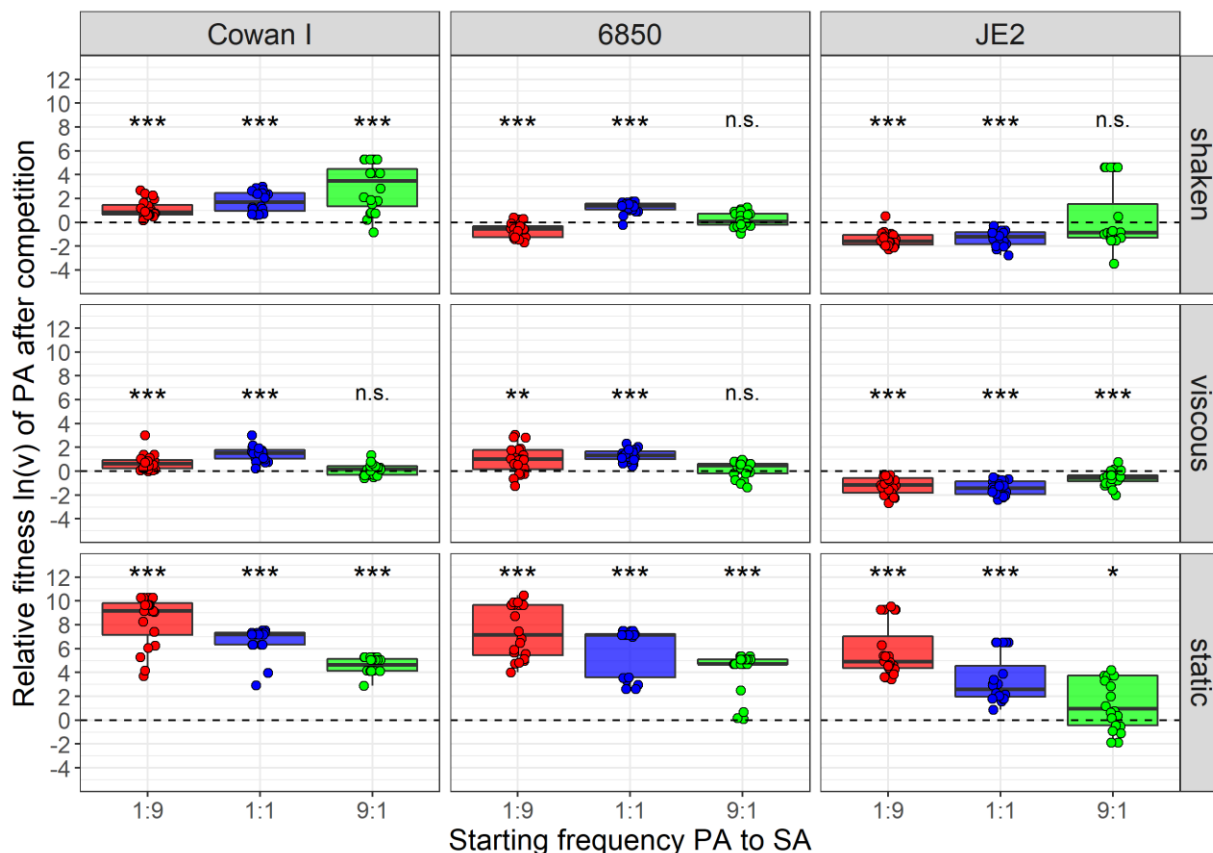

685  
686 **Figure 3.** Relative fitness  $\ln(v)$  of *P. aeruginosa* PAO1 (PA) after 24-hours competitions  
687 against three different *S. aureus* (SA) strains (Cowan I, 6850, JE2) at three different  
688 starting frequencies (1:9 ; 1:1 ; 9:1) and across three different environmental conditions  
689 (shaken, viscous, static). Values of  $\ln(v) < 0$ ,  $\ln(v) > 0$ , or  $\ln(v) = 0$  (dotted line), indicate  
690 whether PA lost, won, or performed equally well in competition against the respective  
691 SA strain. The box plots show the median (bold line) with the first and third quartiles.  
692 The whiskers cover the 1.5\* inter-quartile range (IQR) or extend from the lowest to the  
693 highest value if they fall within the 1.5\* IQR. Each strain pair/culturing condition/starting  
694 frequency combination was repeated 20 times (four experiments featuring five  
695 replicates each). Asterisks indicate whether the relative fitness of PA is significantly  
696 different from zero in a specific treatment (one-sample t-tests with p-values corrected for

697 multiple comparisons using the false discovery rate method: n.s. = not significant, \*  $p <$   
698 0.05, \*\*  $p < 0.01$ , \*\*\*  $p < 0.001$ ). Detailed information on all statistical comparisons are  
699 provided in Table S3.

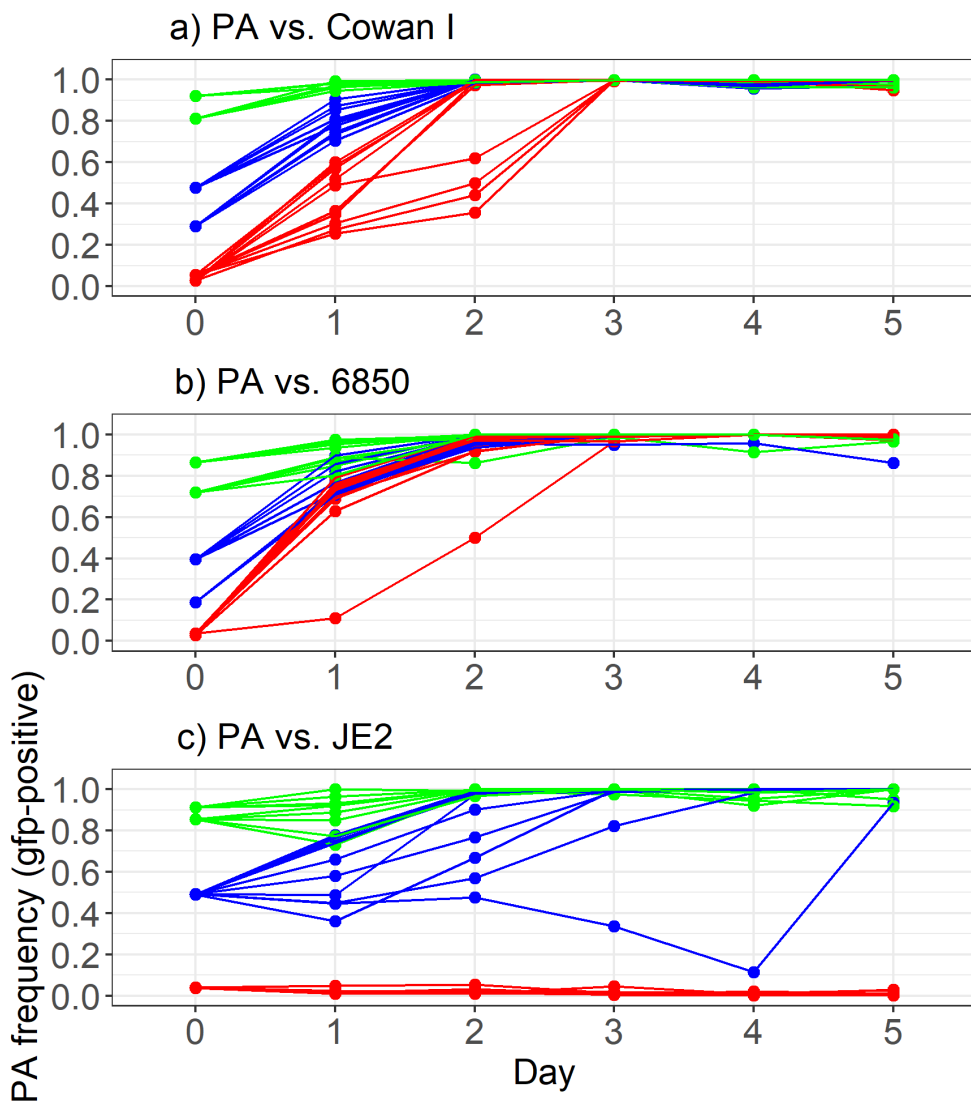

700 **Figure 4.** Multi-day competitive dynamics between *P. aeruginosa* PAO1 (PA) and the  
701 three *S. aureus* strains (a) Cowan I, (b) 6850 and (c) JE2 under shaken conditions.  
702 Competitions started at three volumetric starting frequencies of PA:SA (red 1:9, blue  
703 1:1, green 9:1). Community composition was followed over five days with daily transfer  
704 of diluted cultures to fresh TSB medium. Strain frequencies were assessed using flow  
705 cytometry. The experiment was carried out two times with five replicates per treatment  
706 combination and experiment.
