1 **Strain background, species frequency and environmental conditions are**  
2 **important in determining population dynamics and species co-existence between**  
3 ***Pseudomonas aeruginosa* and *Staphylococcus aureus***

4

5

6

7 Selina Niggli,<sup>a</sup># Rolf Kümmerli<sup>a</sup>

8

9 <sup>a</sup> Department of Quantitative Biomedicine, University of Zürich, Winterthurerstrasse 190,  
10 8057 Zürich, Switzerland

11 # Address correspondence to Selina Niggli, [selina.niggli@uzh.ch](mailto:selina.niggli@uzh.ch)

12

13

14 **Running title:** How ecology affects competition between two pathogens

15

16

17 **Keywords:** opportunistic human pathogens, interspecies interactions, polymicrobial

18 infections, ecological factors, community dynamics

19 **Abstract**

20 Bacterial communities in the environment and in infections are typically diverse, yet we  
21 know little about the factors that determine interspecies interactions. Here, we apply  
22 concepts from ecological theory to understand how biotic and abiotic factors affect  
23 interaction patterns between the two opportunistic human pathogens  
24 *Pseudomonas aeruginosa* and *Staphylococcus aureus*, which often co-occur in  
25 polymicrobial infections. Specifically, we conducted a series of short- and long-term  
26 competition experiments between *P. aeruginosa* PAO1 (as our reference strain) and  
27 three different *S. aureus* strains (Cowan I, 6850, JE2) at three starting frequencies and  
28 under three environmental (culturing) conditions. We found that the competitive ability of  
29 *P. aeruginosa* strongly depended on the strain background of *S. aureus*, whereby  
30 *P. aeruginosa* dominated against Cowan I and 6850, but not against JE2. In the latter  
31 case, both species could end up as winners depending on conditions. Specifically, we  
32 observed strong frequency-dependent fitness patterns, including positive frequency  
33 dependence, where *P. aeruginosa* could dominate JE2 only when common, but not  
34 when rare. Finally, changes in environmental (culturing) conditions fundamentally  
35 altered the competitive balance between the two species, in a way that *P. aeruginosa*  
36 dominance increased when moving from shaken to static environments. Altogether, our  
37 results highlight that ecological details can have profound effects on the competitive  
38 dynamics between co-infecting pathogens, and determine whether two species can co-  
39 exist or invade each others' populations from rare. Moreover, our findings might parallel  
40 certain dynamics observed in chronic polymicrobial infections.

41

42 **Importance**

43 Bacterial infections are frequently caused by more than one species and such  
44 polymicrobial infections are often considered more virulent and more difficult to treat  
45 than the respective monospecies infections. *Pseudomonas aeruginosa* and  
46 *Staphylococcus aureus* are among the most important pathogens in polymicrobial  
47 infections and their co-occurrence is linked to worse disease outcome. There is great  
48 interest in understanding how these two species interact with each other and what the  
49 consequences for the host are. While previous studies have mainly looked at molecular  
50 mechanisms implicated in interactions between *P. aeruginosa* and *S. aureus*, here we  
51 show that ecological factors such as strain background, species frequency and  
52 environmental conditions are important elements determining population dynamics and  
53 species co-existence patterns. We propose that the uncovered principles may also play  
54 major roles in infections, and therefore proclaim that an integrative approach combining  
55 molecular and ecological aspects is required to fully understand polymicrobial  
56 infections.

57

## 58 **Introduction**

59 Bacteria typically live in complex multi-species communities in the environment and  
60 associated with host organisms (1–3). The same holds true in the case of disease, as it  
61 is increasingly recognized that a majority of bacterial infections are polymicrobial,  
62 meaning that they are caused by more than one bacterial species (4, 5). There is great  
63 interest in understanding how bacteria interact and how interactions affect a community  
64 and the associated hosts (6–8). At the mechanistic level, a multitude of ways have been  
65 unraveled through which bacterial species can interact, with mechanisms including  
66 cross-feeding, quorum sensing-based signaling, toxin-mediated interference and  
67 physical interactions via contact-dependent systems (e.g. type VI secretion system) (9–  
68 11). In the context of disease, a key question is how interactions affect species  
69 successions in chronic infections and whether multispecies infections are more virulent  
70 and more difficult to treat than the respective monospecies infections, as it is commonly  
71 assumed (5, 12–14).

72

73 Studying interactions between the two opportunistic human pathogens  
74 *Pseudomonas aeruginosa* (PA) and *Staphylococcus aureus* (SA) has emerged as a  
75 popular and relevant model system (15–17). The reason for this is that the two species  
76 often co-occur in infections, including cystic fibrosis (CF) lung and wound infections  
77 (18–20). Results from laboratory experiments suggest that PA is the superior species,  
78 suppressing growth of SA (21–23) and indeed, PA seems to be a well-equipped  
79 competitor. For example, it has been shown that 4-hydroxy-2-heptylquinoline N-oxide  
80 (HQNO) released by PA inhibits the electron transport chain of SA and induces the

81 formation of small colony variants (SCVs) (22, 24). Furthermore, the PA endopeptidase  
82 LasA is capable of lysing SA cells, a process that releases iron into the environment,  
83 potentially providing a direct benefit to PA (21, 25). While it was observed that  
84 experimental co-infections of PA and SA seem to be more virulent than the respective  
85 monospecies infections (26, 27), evolutionary studies revealed that PA can adapt to the  
86 presence of SA (28) and become more benign in the context of chronic co-infections  
87 (29, 30). Moreover, of clinical relevance is the observation that PA and SA exhibited  
88 increased antibiotic resistance or tolerance when co-cultured compared to being  
89 cultured alone (31–33).

90

91 In this study, we follow a complementary approach to examine how biotic and abiotic  
92 ecological factors influence interactions between PA and SA. Previous work has  
93 primarily focused on the molecular mechanisms driving interactions between specific  
94 strain pairs under defined laboratory conditions. Here we hypothesize that not only  
95 molecular mechanisms, but also ecological factors will have a major impact on species  
96 interactions, particularly on community composition and temporal dynamics between  
97 species. To test our predictions, we used PA strain PAO1 as our focal strain and asked  
98 how (competitive) interactions with SA vary when manipulating: (1) the genetic  
99 background of SA; (2) the frequency of SA in competition with PA; and  
100 (3) environmental (culturing) conditions.

101

102 To vary the genetic background of SA, we competed PA against the three different SA  
103 strains Cowan I, 6850 and JE2. These strains fundamentally differ in several

104 characteristics (Table 1). Cowan I is a methicillin-sensitive SA strain (MSSA), which is  
105 highly invasive towards host cells, non-cytotoxic and defective in the accessory gene  
106 regulator (*agr*) quorum-sensing system (34). 6850 is another MSSA strain, which is  
107 highly invasive, cytotoxic and haemolytic (35–37). Finally, JE2 is a methicillin-resistant  
108 (MRSA) USA300 strain, which is highly virulent, cytotoxic and hemolytic (38, 39). Given  
109 the tremendous differences between these SA strains, we expect PA performance in  
110 competition with SA to vary substantially.

111

112 To manipulate strain frequency, we competed PA against SA at three different starting  
113 frequencies (1:9 ; 1:1 ; 9:1). Frequency-dependent fitness effects occur in many  
114 microbiological systems (40–43). A common pattern is that species have a relative  
115 fitness advantage when rare in a population, but not when common (so-called negative  
116 frequency dependence). This phenomenon can lead to stable co-existence of  
117 competitors. On the other hand, the fitness of a species can also be positive frequency  
118 dependent, which means that a species is dominant when common in the community,  
119 but not when rare. An important consequence of this pattern is that initially rare species  
120 cannot invade an established population.

121

122 To manipulate environmental conditions, we changed simple parameters of our  
123 culturing conditions. First, we compared the performance of PA against SA strains in  
124 shaken liquid vs. viscous medium. Increased environmental viscosity has been shown  
125 to increase spatial structure, thereby decreasing strain interaction rates (44–46).  
126 Second, we compared the performance of PA against SA in shaken vs. static

127 environments. While static conditions also reduce strain mixing, it further leads to a  
128 more heterogeneous environment characterized by gradients from the aerated air-liquid  
129 interface down to the microoxic bottom of a culture (47, 48).

130

131 In a first set of experiments, we assessed the growth performance of all strains in  
132 monoculture under the three different environmental culturing conditions used. Basic  
133 growth differences between strains could induce frequency shifts in co-cultures even in  
134 the absence of direct interactions. We then performed high-throughput 24 hours batch  
135 culture competition experiments between PA and SA using a full-factorial design. All  
136 three species combinations were competed at all three starting frequencies under all  
137 three environmental conditions (see Figure 1 for an illustration of the workflow). Finally,  
138 we followed the temporal dynamics between PA and SA over five days to assess  
139 whether results from 24 hours competitions are predictive for more long-term dynamics  
140 between species and whether species coexistence is possible. (A copy of this  
141 manuscript has been posted on bioRxiv doi: <https://doi.org/10.1101/2020.04.21.052670>)

## 142 **Results**

### 143 **PA grows better than SA in monoculture**

144 We used tryptic soy broth (TSB) as the standard medium for all our assays. In this  
145 medium, we found that the number of doublings varied significantly among strains  
146 during a 24 hours growth cycle under all conditions tested (ANOVA, shaken:  $F_{3,20} =$   
147  $10.71$ ,  $P = 0.0002$ ; viscous:  $F_{3,20} = 4.12$ ,  $P = 0.0199$ ; static:  $F_{3,20} = 20.75$ ,  $P < 0.0001$ ,  
148 Figure 2 and see Table S1 for the full statistical analysis). Under shaken conditions, PA  
149 had the highest number of doublings ( $20.6 \pm 0.63$ , mean  $\pm$  SD), followed by SA strains  
150 6850 ( $18.9 \pm 1.16$ ), Cowan I ( $18.1 \pm 0.41$ ) and JE2 ( $18.0 \pm 1.18$ ). While PA grew  
151 significantly better than all SA strains, the number of doublings did not differ between  
152 the three SA strains (TukeyHSD pairwise comparisons: Cowan I vs. 6850,  $P_{\text{adj}} = 0.3673$ ;  
153 6850 vs. JE2,  $P_{\text{adj}} = 0.3096$ ; Cowan I vs. JE2,  $P_{\text{adj}} = 0.9994$ ). Due to its moderate  
154 growth advantage, PA is expected to slightly increase in frequency in competition with  
155 SA strains under shaken conditions, even in the absence of any direct species  
156 interactions.

157

158 Under viscous conditions, PA had the highest number of doublings as well ( $17.2 \pm$   
159  $1.02$ ), followed by 6850 ( $17.0 \pm 0.76$ ), JE2 ( $16.3 \pm 0.52$ ) and Cowan I ( $15.6 \pm 1.06$ ).  
160 However, differences in the number of doublings were only significant between PA and  
161 Cowan I and between Cowan I and 6850 (TukeyHSD pairwise comparisons: PA vs.  
162 Cowan I,  $P_{\text{adj}} = 0.0265$ ; Cowan I vs. 6850,  $P_{\text{adj}} = 0.0496$ ). Thus, based on growth rate  
163 differences alone, one would expect PA to increase in frequency in competition with  
164 Cowan I but not in competition with the other two SA strains.



165

166 Under static conditions, PA again showed the highest number of doublings ( $18.6 \pm 0.64$ )  
167 followed by 6850 ( $16.5 \pm 0.45$ ), JE2 ( $15.9 \pm 0.96$ ) and Cowan I ( $15.1 \pm 1.05$ ). PA grew  
168 significantly faster than all the three SA strains (TukeyHSD pairwise comparisons: PA  
169 vs. Cowan I,  $P_{\text{adj}} < 0.0001$ ; PA vs. 6850,  $P_{\text{adj}} = 0.0009$ ; PA vs. JE2,  $P_{\text{adj}} < 0.0001$ ), and  
170 one would therefore expect PA to substantially increase in frequency against all three  
171 SA strains under static conditions.

172

173 **Genetic background, strain frequency and environmental factors all influence**  
174 **competition outcomes**

175 The full-factorial design allowed us to simultaneously analyze the impact of SA strain  
176 genetic background, starting frequency, and culturing condition on the competitive  
177 outcomes between PA and SA strains. Our linear statistical model yielded a significant  
178 triple interaction between the three manipulated factors (strain genetic background,  
179 starting frequency and culturing condition; ANCOVA:  $F_{4,509} = 3.41$ ,  $P = 0.0091$ ). While  
180 this shows that all three manipulated factors influence the competitive outcomes  
181 between PA and SA in complex ways, the triple interaction makes it difficult to tease  
182 apart the various effects. The statistical procedure for such cases is to split the model  
183 into sub-models. We followed this approach by first analyzing separate models for each  
184 of the three environmental conditions (shaken, viscous, static), and then split models  
185 according to SA strain background to test for differences between environmental  
186 conditions.

187

## 188 **The competitive ability of PA depends on the SA strain genetic background**

189 Under all three environmental conditions, we found that the relative fitness of PA  
190 significantly depended on the SA strain background (ANCOVA, shaken:  $F_{2,170} = 90.87$ ,  
191  $P < 0.0001$ ; viscous:  $F_{2,168} = 116.76$ ,  $P < 0.0001$ ; static:  $F_{2,170} = 56.52$ ,  $P < 0.0001$ ;  
192 Figure 3). Against Cowan I (Figure 3, column 1), we noted that PA consistently won the  
193 competitions across all starting frequencies and culturing conditions. SA strain 6850  
194 (Figure 3, column 2) turned out to be more competitive than Cowan I under shaken  
195 conditions ( $t_{176} = -6.74$ ,  $P < 0.0001$ ), while it lost similarly against PA under viscous and  
196 static conditions (viscous:  $t_{174} = 0.78$ ,  $P = 0.4350$ ; static:  $t_{176} = -1.99$ ,  $P = 0.0482$ ). In  
197 contrast, JE2 was the most competitive SA strain in our panel (Figure 3, column 3),  
198 performing significantly better than the other two SA strains under all conditions (see  
199 Table S2 for the full statistical analysis), and outcompeted PA under shaken and  
200 viscous conditions.

201

## 202 **The competitive ability of PA depends on its starting frequency in the population**

203 We found that the starting frequency of the two competitors had varying but always  
204 significant effects on the competitive ability of PA (ANCOVA, shaken:  $F_{1,170} = 52.81$ ,  
205  $P < 0.0001$ ; viscous, interaction with strain background:  $F_{2,168} = 10.05$ ,  $P < 0.0001$ ;  
206 static:  $F_{1,170} = 162.32$ ,  $P < 0.0001$ ). Under shaken conditions (Figure 3, row 1), we  
207 observed that the relative fitness of PA increased when initially more common, thus  
208 following a positive frequency-dependent pattern. Under viscous conditions (Figure 3,  
209 row 2), the same positive frequency-dependent effect was only observed when PA  
210 competed with JE2. In competition with Cowan I or 6850, we noted that the relative

211 fitness of PA peaked at intermediate starting frequencies. Under static conditions  
212 (Figure 3, row 3), we observed a pattern opposite to the one seen under shaken  
213 conditions for all strain pair combinations. The relative fitness of PA decreased when  
214 initially more common, thus following a negative frequency-dependent pattern (see  
215 Table S2 for the full statistical analysis).

216

### 217 **The competitive ability of PA is highest under static conditions**

218 Next, we compared the competitive outcomes among the different culturing conditions  
219 (shaken, viscous and static) for each strain combination separately. For all strain  
220 combinations, the culturing condition significantly affected competition outcomes  
221 (ANCOVA, Cowan I:  $F_{2,168} = 461.73$ ,  $P < 0.0001$ ; 6850:  $F_{2,167} = 428.16$ ,  $P < 0.0001$ ; JE2:  
222  $F_{2,168} = 199.95$ ,  $P < 0.0001$ ). In competition with all three SA strains, we found that the  
223 relative fitness of PA was significantly higher under static compared to shaken  
224 conditions (Cowan I:  $t_{174} = 19.99$ ,  $P < 0.0001$ ; 6850:  $t_{174} = 17.99$ ,  $P < 0.0001$ ; JE2:  $t_{174} =$   
225  $15.39$ ,  $P < 0.0001$ ). In contrast, there were no significant differences in the relative  
226 fitness of PA between shaken and viscous conditions for Cowan I ( $t_{174} = 0.91$ ,  $P =$   
227  $0.3644$ ) and JE2 ( $t_{174} = 0.82$ ,  $P = 0.4117$ ), while against 6850, PA was more competitive  
228 under viscous than shaken conditions ( $t_{174} = 3.53$ ,  $P = 0.0005$ ) (see Table S2 for the full  
229 statistical analysis).

230

### 231 **Temporal dynamics between PA and SA**

232 In a next experiment, we competed PA and SA strains over five days under shaken  
233 conditions using the same three starting frequencies and by transferring cultures to

234 fresh medium every 24 hours. The aim of this experiment was to follow the more long-  
235 term species dynamics and to assess whether stable coexistence between PA and SA  
236 can arise.

237

238 In competition with Cowan I, we found PA to be the dominant species (Figure 4a). It  
239 strongly increased in frequency already at day 1 under all starting frequencies and  
240 almost completely outcompeted Cowan I by day 3 (i.e., Cowan I remained below  
241 detection limit). Thus, we could not observe coexistence between PA and Cowan I. In  
242 competition with 6850, we observed similar population dynamics (Figure 4b). PA  
243 strongly increased in frequency from day 1 onwards at all starting frequencies and after  
244 three days, the bacterial populations almost entirely consisted of PA. Only in 10 out of  
245 30 populations, 6850 managed to persist at very low frequencies by day 5 (< 3% in nine  
246 cases, and 13% in one case). In competition with JE2, we found community trajectories  
247 that were strikingly different from the other two strain combinations (Figure 4c). First, we  
248 observed that JE2 was a strong competitor, keeping PA at bay in many populations  
249 during the first 24 hours of the experiment. Following day 1, community dynamics  
250 followed positive frequency-dependent patterns. In all populations with intermediate or  
251 high PA starting frequencies, PA became the dominant species, and SA was recovered  
252 at low frequency in only a minority of populations by day 5 (3 out of 20 at < 10% of the  
253 population). In stark contrast, in populations where PA was initially rare, it did not  
254 increase in frequency, could not invade the SA populations and remained at a low  
255 frequency (< 10%) throughout the 5 days.

## 256 **Discussion**

257 *Pseudomonas aeruginosa* (PA) and *Staphylococcus aureus* (SA) frequently occur  
258 together in polymicrobial infections, where they cause severe host damage and lead to  
259 increased morbidity and mortality in patients (14, 49, 50). Consequently, there is high  
260 interest in understanding how PA and SA interact and how their interactions may  
261 influence disease outcome (12, 15). While most previous studies have focused on  
262 molecular aspects (51, 52), we here examined how a set of ecological factors affect  
263 competitive interactions between the two species. Our study, carried out in an *in vitro*  
264 batch culture system, revealed that: (i) the competitive ability of PA varied extensively  
265 as a function of the genetic background of SA; (ii) there were strong frequency-  
266 dependent fitness patterns, including positive-frequency dependent relationships where  
267 PA could only dominate a particular SA strain (JE2) when common, but not when rare;  
268 and (iii) changes in environmental (culturing) conditions fundamentally affected the  
269 competitive balance between the two species. The key conclusion from our results is  
270 that ecology matters, and that variation in biotic and abiotic factors affect interactions  
271 between pathogenic bacterial species. This is most likely not only the case in *in vitro*  
272 systems, but also in the context of polymicrobial infections.

273

274 PA has often been described as the dominant pathogen possibly displacing SA in  
275 infections (21, 53–55). Our results support this view, as PA dominated over SA under  
276 many conditions in 24 hours and 5-day competition experiments (Figures 3 and 4).  
277 However, PA did not always emerge as the winner and its success significantly varied in  
278 response to the genetic background of SA. Specifically, JE2 was the strongest

279 competitor, followed by 6850 and Cowan I. While differences in monoculture growth  
280 performance can explain why PA dominates in many cases, they cannot explain the  
281 variation in competitive abilities among SA strains, because the three SA strains grew  
282 similarly under all conditions (Figure 2). PA vs. JE2 makes the strongest case for a  
283 mismatch between growth performance in mono- vs. mixed cultures, as PA grew  
284 significantly better than JE2 in monoculture under shaken conditions, but typically lost  
285 the competition in mixed cultures in this environment (Figures 2 and 3). This suggests  
286 that apart from resource competition via growth rate differences, other factors must  
287 contribute to the competitive ability of SA strains towards PA. Such factors could include  
288 interference mechanisms. For example, it is known that genetically different SA strains  
289 widely differ in virulence among each other (56–58). Interestingly, we found that the  
290 competitive ability of our three SA strains against PA correlated with their reported  
291 virulence level in infections (34, 36, 39). This could indicate that factors important for SA  
292 virulence (e.g. toxins or secreted enzymes) might also be involved in interactions with  
293 competitor bacteria. For JE2 and related USA300 isolates, there are many genetic  
294 determinants known to be important for their success as opportunistic human  
295 pathogens (59). Among them are the cytotoxin Panton-Valentine leukocidin (PVL), the  
296 arginine catabolic mobile element (ACME) and the phenol soluble modulins (PSMs)  
297 (60). Derivatives of PSMs have previously been shown to exhibit inhibitory activity  
298 against *Streptococcus pyogenes* (61). The authors of this work suggested that high  
299 production of PSMs might not only benefit SA in host colonization, but also in  
300 competition against co-infecting pathogens. Thus, it seems plausible that the USA300  
301 derivative JE2 deploys a similar mechanism against PA in our competition experiments.

302 Strain 6850 showed intermediate competitiveness against PA. As Cowan I, 6850 is a  
303 MSSA strain, but it is known to be more virulent than Cowan I and therefore likely  
304 produces certain substances that could also be important in competition with PA (34,  
305 36). Conversely, Cowan I is known to have a nonfunctional accessory gene regulator  
306 (*agr*) quorum sensing system (34). The *agr* controls most virulence determinants in SA  
307 (62). If virulence determinants also played a role in interspecies competition, then this  
308 could explain why Cowan I turned out to be the least competitive SA strain against PA.

309

310 Important to note is that we only manipulated the SA but not the PA strain background,  
311 so that we cannot draw conclusions on genotype-by-genotype interactions. Such  
312 interactions are likely to play a role as evidenced by previous studies showing that  
313 genetically diverse PA clinical isolates widely differ in their ability to inhibit SA (29, 63,  
314 64). More recently, it has also been shown that SA clinical isolates vary in their  
315 interactions with PA, from being highly sensitive to completely tolerant against PA-  
316 mediated effects (65). One aim of our future work is to follow up these proposed  
317 mechanistic leads and test some of the outlined hypotheses above in order to explain  
318 differences in the competitive abilities between SA strains towards PA.

319

320 Another insight from our experiments is that the competitive ability of PA often  
321 depended on its starting frequency in the population, and that the type of frequency-  
322 dependent interactions (positive or negative) varied across environmental conditions  
323 (Figure 3). Our purpose was to compare three experimentally defined starting  
324 frequencies to mimic what is happening when a species is either rare (1:9), at parity

325 with its competitor (1:1) or dominant (9:1). Under natural conditions, including infections,  
326 species frequencies could of course be more extreme, and invasion from rare could  
327 start at species frequencies that would be below the detection limit of our methods.  
328 In our experiments, we observed that under static conditions, the relative fitness of PA  
329 declined when more common in the population, but PA still won at all frequencies. This  
330 pattern is common for a highly dominant species that drives a competitor to extinction  
331 (66). Its decline in relative fitness simply reflects the fact that the room for further  
332 absolute frequency gains is reduced when a high frequency is already reached. In stark  
333 contrast, under shaken conditions, we found that the relative fitness of PA increased  
334 when it was more common in the population. Against Cowan I and 6850, this positive  
335 frequency-dependent fitness pattern did not affect the long-term community dynamics  
336 and PA won at all frequencies (Figure 4a+b). Against JE2, however, the 24 hours  
337 competition data suggest that, in most cases, PA cannot invade populations when  
338 initially rare and this is exactly what we observed in the long-term experiments: when its  
339 initial frequency was below 10%, PA did not increase in frequency, while it always fixed  
340 in the population or reached very high frequencies when initially occurring above 10%.  
341 There were two additional interesting observations with regards to PA-JE2 long-term  
342 dynamics. First, there were no major changes in PA frequency relative to JE2 during the  
343 first 24 hours (compatible with the competition assay data in Figure 3), and clear  
344 positive-frequency dependent patterns only emerged from 48 hours onwards. One  
345 possible explanation for this pattern is that PA is initially naïve, but then senses and  
346 mounts a more competitive response over time (67). Similarly, SA might also respond,  
347 for example through increased formation of small colony variants (SCVs), which are



348 known to be induced by inhibitory exoproducts released by PA (22, 24). Second, one  
349 replicate (starting frequency 1:1) did not follow the above rules: PA continuously  
350 dropped in frequency until day 4 (11%) and then sharply increased to 93% on day 5.  
351 This frequency “zigzag” pattern is an indicator of antagonistic co-evolution (68), where  
352 the spread of a beneficial mutation in one species (SA) is followed by a counter-  
353 adaptation in the competing species (PA). It therefore seems that such evolutionary  
354 dynamics can already occur within relatively short periods of time. This finding supports  
355 evidence from studies on clinical PA isolates, which showed patterns of adaptations  
356 towards SA favoring co-existence between the two species over time (29, 30).

357

358 Our results further show that the competitive ability of PA is profoundly influenced by  
359 environmental (culturing) conditions (Figure 3). The largest differences arose between  
360 shaken and static culturing conditions with PA being most competitive in the latter  
361 environment. PA is known to be metabolically versatile, it is motile and grows well under  
362 microoxic conditions (69, 70). Static conditions introduce strong oxygen and nutrient  
363 gradients, and our results from monoculture growth show that PA grows better under  
364 these conditions than SA (Figure 2). This is certainly part of the reason why PA ends up  
365 as the competition winner against all SA strains under static conditions. With regard to  
366 medium viscosity, we initially hypothesized that increased spatial structure could temper  
367 competitive interactions and favor species co-existence, as competitors are spatially  
368 more segregated from each other (44, 71, 72). However, we found no support for this  
369 hypothesis as the competitive ability of PA did not much differ between shaken and  
370 viscous environments. While the spatial structure, introduced through the addition of

371 agar to the liquid growth medium, had significant effects on within-species social  
372 interactions in other study systems (66, 73), it did not appreciably affect the between-  
373 species interactions in our setup. One reason might be that the degree of spatial  
374 structure introduced (0.2% agar in TSB) was simply not high enough to see an effect.  
375 This could especially be true if toxins were involved in mediating interactions – small  
376 molecules that can freely diffuse and target competitors that are not physically close-by.

377

378 We argue that our results, even though they stem from an *in vitro* system, could have at  
379 least three important implications for our understanding of polymicrobial infections. First,  
380 we show that the biological details of the strain background matter and determine who  
381 is dominant in a co-infection and whether co-existence between species is possible.  
382 Thus, we need to be careful not to overinterpret interaction data from a single PA-SA  
383 strain pair and conclude that the specific details found apply to PA-SA interactions in  
384 general. Second, there might be strong order effects, such that the species that infects  
385 a host first cannot be invaded by a later arriving species. This scenario applied to the  
386 interactions between PA and SA strain JE2, which were both unable to invade  
387 populations of the other species from rare. Finally, local physiological conditions at the  
388 infection site, like the degree of spatial structure or oxygen supply, can shift the  
389 competitive balance between species. This suggests that infections at certain sites  
390 might be more prone than others to polymicrobial infections, or to experience ecological  
391 shifts from one pathogen to another. To sum up, we wish to reiterate our take home  
392 message that the ecology of interactions between pathogens should receive more  
393 attention and may explain so far unresolved aspects of polymicrobial infections.

## 394 **Materials and Methods**

### 395 **Bacterial strains, media and growth conditions**

396 We used the *Pseudomonas aeruginosa* (PA) strain PAO1 (74) as our PA reference  
397 strain and the *Staphylococcus aureus* (SA) strains Cowan I, 6850 and JE2 for all  
398 experiments (Table 1). To distinguish PA from SA strains, we used a variant of our PA  
399 strain PAO1, which constitutively expresses the green fluorescent protein, from a single-  
400 copy gene (*attTn7::ptac-gfp*), stably integrated in the chromosome (75, 76). We chose  
401 the rich laboratory medium tryptic soy broth (TSB, Becton Dickinson) for all our  
402 experiments, because it supports growth of all the strains used. Bacterial stocks were  
403 prepared by mixing 50% of culture with 50% of a 85% glycerol solution and were stored  
404 at -80 °C. For all experiments, overnight cultures were grown in 10 ml TSB in 50 ml  
405 falcon tubes for  $\pm$  16 hours at 37 °C and 220 rpm with aeration. After centrifugation and  
406 removal of the supernatant, we washed bacterial cells using 10 ml 0.8% NaCl solution  
407 and adjusted the OD<sub>600</sub> (optical density at 600 nm) to obtain similar cell numbers per ml  
408 for each strain. All media, buffer and washing solutions were sterilized by autoclaving at  
409 121°C for 20 minutes and subsequently stored at room temperature in the dark. For all  
410 experiments, blanks were used to ensure the sterility of the media during  
411 experimentation.

412

### 413 **Calculating number of doublings for each strain in monoculture**

414 To assess the number of doublings of each strain in monoculture, we grew our strains in  
415 TSB (or TSB + 0.2% agar, respectively) under the same conditions and using the same  
416 starting OD<sub>600</sub> as for the competition experiments (see below). We serially diluted cells

417 at the start ( $t_0$ ) and after 24 hours ( $t_{24}$ ), and plated aliquots on TSB + 1.2% agar. The  
418 plates were incubated overnight at 37 °C and colony- forming units (CFUs) counted for  
419 both timepoints on the following day. We estimated the number of doublings (D) for  
420 each strain as  $D = (\ln(x_{24}/x_0))/\ln(2)$ , where  $x_0$  and  $x_{24}$  are the initial and the final CFU/ml,  
421 respectively (23). We performed this experiment two times with three replicates per  
422 strain per experiment.

423

### 424 **Competition experiments**

425 To initiate competitions, we mixed PA and SA strain pairs at three different starting  
426 frequencies (1:9, 1:1, 9:1) from washed and OD<sub>600</sub>-adjusted overnight cultures (see  
427 above). Competitions occurred in 24-well plates filled with 1.5 ml TSB per well. The  
428 starting OD<sub>600</sub> of both mixed and monocultures was 10<sup>-5</sup>. Monocultures of each strain  
429 served as controls in each experiment. We incubated plates for 24 hours at 37 °C under  
430 three different culturing conditions: shaken (170 rpm), viscous (170 rpm with 0.2% agar  
431 in TSB) and static. Prior and after the 24 hours competition period, we estimated the  
432 actual strain frequencies for each replicate using flow cytometry. We performed four  
433 independent experiments each featuring five replicates for each strain/starting  
434 frequency/condition combination. A graphical representation of the competition workflow  
435 is provided in Figure 1.

436

437 To follow community dynamics over time, we set up competitions in the same way as  
438 described above. After the first 24 hours of competition, we diluted cultures 1:10,000  
439 into fresh TSB medium. This process was repeated for five consecutive days. Strain

440 frequencies were assessed using flow cytometry prior and after each 24 hours  
441 competition cycle. We carried out two independent experiments for each strain pair and  
442 starting frequency combination with 5 replicates per strain pair and frequency.

443

#### 444 **Flow cytometry to estimate relative species frequency**

445 We assessed the relative strain frequencies at the beginning and at the end of each  
446 competition using a BD LSR II Fortessa flow cytometer (flow cytometry facility,  
447 University of Zürich) and the FlowJo™ software (BD, Bioscience) for data analysis. As  
448 our PA strain expresses a constitutive gfp tag, PA cells could unambiguously be  
449 distinguished from the gfp-negative SA cells with a blue laser line (excitation at 488 nm)  
450 and the FITC channel (emission: mirror 505 longpass, filter 530/30) (see supplementary  
451 Figure 1). Cytometer Setup and Tracking settings of the instrument were used for each  
452 experiment and the threshold of particle detection was set to 200 V (lowest possible  
453 value). We diluted cultures appropriately in sterile-filtered 1x phosphate buffered saline  
454 (PBS, Gibco, Thermo Fisher) and recorded 100,000 events with a low flow rate. The  
455 following controls were used for data acquisition in every experiment: 1) PBS blank  
456 samples (to estimate number of background counts of the flow cytometer), 2) untagged  
457 monocultures (negative fluorescence control, used to set a fluorescence threshold in  
458 FlowJo™) and 3) constitutive gfp-expressing monocultures (positive fluorescence  
459 control, set to 100% gfp-positive cells). Using our fluorescence threshold, we extracted  
460 the percentage of gfp-positive cells for each sample and scaled these values to the  
461 positive fluorescence control. The resulting percentage corresponds to the frequency of  
462 PA present in the respective replicate. Initial and final strain frequencies were used to

463 calculate the relative fitness ( $v$ ) of the focal strain PA as  $v = [a_t \times (1-a_0)] / [a_0 \times (1-a_t)]$ ,  
464 where  $a_0$  and  $a_t$  are the initial and final frequencies of PA, respectively (43). We ln-  
465 transformed all relative fitness values to obtain normally distributed residuals. Values of  
466  $\ln(v) > 0$  or  $\ln(v) < 0$  indicate whether the frequency of the focal strain PA increased (i.e.  
467 PA won the competition) or decreased (i.e. PA lost competition) relative to its SA  
468 competitor.

469

470 We know from previous experiments in our laboratory that due to the gfp tag, our PA  
471 strain does have a slight fitness defect in competition with its untagged parental strain  
472 ( $\ln(v) = -0.358 \pm 0.13$ , mean  $\pm$  95% CI, see (66)). As we consistently used the same  
473 gfp-tagged PA strain for all experiments in this study, results are fully comparable  
474 among treatments.

475

476 To test whether flow cytometry counts (measuring all viable and non-viable cells)  
477 correlate with CFUs (measuring only viable cells), we serially diluted and plated initial  
478 and final strain frequencies from competitions performed under shaken conditions for all  
479 three strain combinations on TSB + 1.2% agar. We compared the obtained CFUs with  
480 the flow cytometry counts from the same samples and found strong positive correlations  
481 for the strain frequency estimates between the two methods (see supplementary  
482 figure 2). This means that flow cytometry adequately measures strain frequencies and  
483 that the two methods (flow cytometry and CFU counts) yield similar results.

484

485 **Statistical analysis**

486 All statistical analyses were performed with R Studio version 3.6.1. We used analysis of  
487 variance (ANOVA) and Tukey's HSD to compare number of doublings in monocultures  
488 of PA and SA. To test whether the relative fitness of PA varies in response to the SA  
489 strain genetic background, starting frequency and culturing conditions, we first built a  
490 factorial analysis of co-variance (ANCOVA), with SA strain genetic background and  
491 culturing conditions as factors and the starting frequency as covariate. We further  
492 included 'experimental block' as an additional factor to account for variation between  
493 experiments. This full model yielded a significant triple interaction between SA strain  
494 genetic background, starting frequency and culturing condition. We therefore split the  
495 full model into a set of ANCOVA sub-models, separated either by culturing condition  
496 (shaken, viscous, static) or by SA strain genetic background (Cowan I, 6850, JE2). For  
497 post-hoc pairwise comparisons between culturing conditions or SA strains in the sub-  
498 models, we removed 'experimental block' as additional factor from the model. To test  
499 whether PA relative fitness is significantly different from zero under a given  
500 strain/starting frequency/condition combination, we performed one sample t-tests and  
501 used the false discovery rate method to correct p-values for multiple comparisons (77).  
502 To compare strain frequencies obtained by flow cytometry with those obtained by  
503 plating (CFUs), we used Pearson correlation analysis. For all data sets, we consulted  
504 Q-Q plots and results from the Shapiro-Wilk test to ensure that our residuals were  
505 normally distributed. Summary tables for linear models and t-tests used to analyze  
506 Figures 2 and 3 can be found in the supplemental material (Tables 1-3).

507

508

509 **Data availability**

510 All raw data sets have been deposited in the figshare repository (DOI will be provided  
511 upon the acceptance of the manuscript).

512



513 **Conflict of Interest**

514 The authors declare no conflict of interest.

515

516 **Acknowledgements**

517 We thank Markus Huemer (University Hospital of Zürich) for providing *S. aureus* strains  
518 and the flow cytometry facility (University of Zürich) for technical support and  
519 maintenance of resources. This project has received funding from the European  
520 Research Council (ERC) under the European Union's Horizon 2020 research and  
521 innovation programme (grant agreement no. 681295) to RK. Illustration for Figure 1 was  
522 created using BioRender ([www.biorender.com](http://www.biorender.com)).

523

524 **Author contributions**

525 S.N. and R.K. designed research, S.N. performed research, S.N. and R.K. analysed  
526 data and wrote the paper.

527 **References**

- 528 1. Stubbendieck RM, Vargas-Bautista C, Straight PD. 2016. Bacterial communities:  
529 Interactions to scale. *Front Microbiol* 7:1–19.
- 530 2. Donaldson GP, Lee SM, Mazmanian SK. 2016. Gut biogeography of the bacterial  
531 microbiota. *Nat Rev Microbiol* 14:20–32.
- 532 3. Human Microbiome Project Consortium. 2012. Structure, function and diversity of  
533 the healthy human microbiome. *Nature* 486:207–214.
- 534 4. Brogden KA, Brogden KA, Guthmiller JM, Guthmiller JM, Taylor CE, Taylor CE,  
535 Guthmiller JM, Guthmiller JM. 2005. Human polymicrobial infections. *Lancet*  
536 365:253–255.
- 537 5. Peters BM, Jabra-Rizk MA, O'May GA, William Costerton J, Shirtliff ME. 2012.  
538 Polymicrobial interactions: Impact on pathogenesis and human disease. *Clin*  
539 *Microbiol Rev* 25:193–213.
- 540 6. Rogers GB, Hoffman LR, Carroll MP, Bruce KD. 2013. Interpreting infective  
541 microbiota: The importance of an ecological perspective. *Trends Microbiol*  
542 21:271–276.
- 543 7. De Vos MGJ, Zagorski M, McNally A, Bollenbach T. 2017. Interaction networks,  
544 ecological stability, and collective antibiotic tolerance in polymicrobial infections.  
545 *Proc Natl Acad Sci U S A* 114:10666–10671.
- 546 8. Rezzoagli C, Granato ET, Kümmerli R. 2020. Harnessing bacterial interactions to  
547 manage infections: A review on the opportunistic pathogen *Pseudomonas*  
548 *aeruginosa* as a case example. *J Med Microbiol* 69:147–161.
- 549 9. Short FL, Murdoch SL, Ryan RP. 2014. Polybacterial human disease: The ills of

- 550 social networking. *Trends Microbiol* 22:508–516.
- 551 10. Tashiro Y, Yawata Y, Toyofuku M, Uchiyama H, Nomura N. 2013. Interspecies  
552 interaction between *Pseudomonas aeruginosa* and other microorganisms.  
553 *Microbes Environ* 28:13–24.
- 554 11. Ryan RP, Dow JM. 2008. Diffusible signals and interspecies communication in  
555 bacteria. *Microbiology* 154:1845–1858.
- 556 12. Murray JL, Connell JL, Stacy A, Turner KH, Whiteley M. 2014. Mechanisms of  
557 synergy in polymicrobial infections. *J Microbiol* 52:188–199.
- 558 13. Hubert D, Réglie-Poupet H, Sermet-Gaudelus I, Ferroni A, Le Bourgeois M,  
559 Burgel PR, Serreau R, Dusser D, Poyart C, Coste J. 2013. Association between  
560 *Staphylococcus aureus* alone or combined with *Pseudomonas aeruginosa* and  
561 the clinical condition of patients with cystic fibrosis. *J Cyst Fibros* 12:497–503.
- 562 14. Maliniak ML, Stecenko AA, McCarty NA. 2016. A longitudinal analysis of chronic  
563 MRSA and *Pseudomonas aeruginosa* co-infection in cystic fibrosis: A single-  
564 center study. *J Cyst Fibros* 15:350–356.
- 565 15. Limoli DH, Hoffman LR. 2019. Help, hinder, hide and harm: What can we learn  
566 from the interactions between *Pseudomonas aeruginosa* and *Staphylococcus*  
567 *aureus* during respiratory infections. *Thorax* 74:684–692.
- 568 16. Orazi G, Ruoff KL, O'Toole GA. 2019. *Pseudomonas aeruginosa* Increases the  
569 Sensitivity of Biofilm-Grown *Staphylococcus aureus* to Membrane-Targeting  
570 Antiseptics and Antibiotics . *MBio* 10:1–15.
- 571 17. Tognon M, Köhler T, Luscher A, Van Delden C. 2019. Transcriptional profiling of  
572 *Pseudomonas aeruginosa* and *Staphylococcus aureus* during in vitro co-culture.

- 573 BMC Genomics 20:1–15.
- 574 18. Cystic Fibrosis Trust. 2014. UK Cystic Fibrosis Registry Annual data report 2018.  
575 Registry.
- 576 19. Gjødsbøl K, Christensen JJ, Karlsmark T, Jørgensen B, Klein BM, Krogfelt KA.  
577 2006. Multiple bacterial species reside in chronic wounds: A longitudinal study. *Int*  
578 *Wound J* 3.
- 579 20. Malic S, Hill KE, Hayes A, Percival SL, Thomas DW, Williams DW. 2009.  
580 Detection and identification of specific bacteria in wound biofilms using peptide  
581 nucleic acid fluorescent in situ hybridization (PNA FISH). *Microbiology* 155:2603–  
582 2611.
- 583 21. Mashburn LM, Jett AM, Akins DR, Whiteley M. 2005. *Staphylococcus aureus*  
584 serves as an iron source for *Pseudomonas aeruginosa* during in vivo coculture. *J*  
585 *Bacteriol* 187:554–566.
- 586 22. Hoffman LR, Déziel E, D’Argenio DA, Lépine F, Emerson J, McNamara S, Gibson  
587 RL, Ramsey BW, Miller SI. 2006. Selection for *Staphylococcus aureus* small-  
588 colony variants due to growth in the presence of *Pseudomonas aeruginosa*. *Proc*  
589 *Natl Acad Sci U S A* 103:19890–19895.
- 590 23. Harrison F, Paul J, Massey RC, Buckling A. 2008. Interspecific competition and  
591 siderophore-mediated cooperation in *Pseudomonas aeruginosa*. *ISME J* 2:49–55.
- 592 24. Biswas L, Biswas R, Schlag M, Bertram R, Götz F. 2009. Small-colony variant  
593 selection as a survival strategy for *Staphylococcus aureus* in the presence of  
594 *Pseudomonas aeruginosa*. *Appl Environ Microbiol* 75:6910–6912.
- 595 25. Kessler E, Safrin M, Olson JC, Ohman DE. 1993. Secreted LasA of

- 596 *Pseudomonas aeruginosa* is a Staphylolytic Protease. J Biol Chem 268:7503–  
597 7508.
- 598 26. Dalton T, Dowd SE, Wolcott RD, Sun Y, Watters C, Griswold JA, Rumbaugh KP.  
599 2011. An in vivo polymicrobial biofilm wound infection model to study interspecies  
600 interactions. PLoS One 6.
- 601 27. Pastar I, Nusbaum AG, Gil J, Patel SB, Chen J, Valdes J, Stojadinovic O, Plano  
602 LR, Tomic-Canic M, Davis SC. 2013. Interactions of Methicillin Resistant  
603 Staphylococcus aureus USA300 and Pseudomonas aeruginosa in Polymicrobial  
604 Wound Infection. PLoS One 8:1–11.
- 605 28. Tognon M, Köhler T, Gdaniec BG, Hao Y, Lam JS, Beaume M, Luscher A,  
606 Buckling A, Van Delden C. 2017. Co-evolution with Staphylococcus aureus leads  
607 to lipopolysaccharide alterations in Pseudomonas aeruginosa. ISME J 11:2233–  
608 2243.
- 609 29. Michelsen CF, Christensen AMJ, Bojer MS, Høiby N, Ingmer H, Jelsbak L. 2014.  
610 Staphylococcus aureus alters growth activity, autolysis, and antibiotic tolerance in  
611 a human host-adapted Pseudomonas aeruginosa lineage. J Bacteriol 196:3903–  
612 3911.
- 613 30. Michelsen CF, Khademi SMH, Johansen HK, Ingmer H, Dorrestein PC, Jelsbak L.  
614 2016. Evolution of metabolic divergence in Pseudomonas aeruginosa during long-  
615 term infection facilitates a proto-cooperative interspecies interaction. ISME J  
616 10:1330–1336.
- 617 31. DeLeon S, Clinton A, Fowler H, Everett J, Horswill AR, Rumbaugh KP. 2014.  
618 Synergistic interactions of Pseudomonas aeruginosa and Staphylococcus aureus

- 619 in an In vitro wound model. *Infect Immun* 82:4718–4728.
- 620 32. Beaudoin T, Yau YCW, Stapleton PJ, Gong Y, Wang PW, Guttman DS, Waters V.  
621 2017. Staphylococcus aureus interaction with Pseudomonas aeruginosa biofilm  
622 enhances tobramycin resistance. *npj Biofilms Microbiomes* 3:25.
- 623 33. Orazi G, O’Toole GA. 2017. Pseudomonas aeruginosa alters Staphylococcus  
624 aureus sensitivity to vancomycin in a biofilm model of cystic fibrosis infection.  
625 *MBio* 8:1–17.
- 626 34. Grundmeier M, Tuchscher L, Brück M, Viemann D, Roth J, Willscher E, Becker  
627 K, Peters G, Löffler B. 2010. Staphylococcal Strains Vary Greatly in Their Ability  
628 to Induce an Inflammatory Response in Endothelial Cells. *J Infect Dis* 201:871–  
629 880.
- 630 35. Vann JM, Proctor RA. 1987. Ingestion of Staphylococcus aureus by bovine  
631 endothelial cells results in time- and inoculum-dependent damage to endothelial  
632 cell monolayers. *Infect Immun* 55:2155–2163.
- 633 36. Haslinger-Löffler B, Kahl BC, Grundmeier M, Strangfeld K, Wagner B, Fischer U,  
634 Cheung AL, Peters G, Schulze-Osthoff K, Sinha B. 2005. Multiple virulence  
635 factors are required for Staphylococcus aureus-induced apoptosis in endothelial  
636 cells. *Cell Microbiol* 7:1087–1097.
- 637 37. Balwit JM, Langevelde P Van, Vann JM, Proctorn RA. 1994. Gentamicin-resistant  
638 menadione and hemin auxotrophic staphylococcus aureus persist within cultured  
639 endothelial cells. *J Infect Dis* 170:1033–1037.
- 640 38. Nimmo GR. 2012. USA300 abroad: Global spread of a virulent strain of  
641 community-associated methicillin-resistant Staphylococcus aureus. *Clin Microbiol*

- 642 Infect 18:725–734.
- 643 39. Thurlow LR, Joshi GS, Richardson AR. 2012. Virulence strategies of the dominant  
644 USA300 lineage of community-associated methicillin-resistant *Staphylococcus*  
645 *aureus* (CA-MRSA). *FEMS Immunol Med Microbiol* 65:5–22.
- 646 40. Rendueles O, Amherd M, Velicer GJ. 2015. Positively Frequency-Dependent  
647 Interference Competition Maintains Diversity and Pervades a Natural Population  
648 of Cooperative Microbes. *Curr Biol* 25:1673–1681.
- 649 41. Healey D, Axelrod K, Gore J. 2016. Negative frequency-dependent interactions  
650 can underlie phenotypic heterogeneity in a clonal microbial population. *Mol Syst*  
651 *Biol* 12:877.
- 652 42. Levin BR. 1988. Frequency-dependent selection in bacterial populations. *Philos*  
653 *Trans R Soc Lond B Biol Sci* 319:459–472.
- 654 43. Ross-Gillespie A, Gardner A, West SA, Griffin AS. 2007. Frequency dependence  
655 and cooperation: Theory and a test with bacteria. *Am Nat* 170:331–342.
- 656 44. Kerr B, Riley MA, Feldman MW, Bohannon BJM. 2002. Local dispersal promotes  
657 biodiversity in a real-life game of rock-paper-scissors. *Nature* 418:171–174.
- 658 45. Van Gestel J, Weissing FJ, Kuipers OP, Kovács ÁT. 2014. Density of founder  
659 cells affects spatial pattern formation and cooperation in *Bacillus subtilis* biofilms.  
660 *ISME J* 8:2069–2079.
- 661 46. Weigert M, Ross-Gillespie A, Leinweber A, Pessi G, Brown SP, Kümmerli R.  
662 2017. Manipulating virulence factor availability can have complex consequences  
663 for infections. *Evol Appl* 10:91–101.
- 664 47. Spiers AJ, Bohannon J, Gehrig SM, Rainey PB. 2003. Biofilm formation at the air-

- 665 liquid interface by the *Pseudomonas fluorescens* SBW25 wrinkly spreader  
666 requires an acetylated form of cellulose. *Mol Microbiol* 50:15–27.
- 667 48. Borer B, Tecon R, Or D. 2018. Spatial organization of bacterial populations in  
668 response to oxygen and carbon counter-gradients in pore networks. *Nat Commun*  
669 9.
- 670 49. Limoli DH, Yang J, Khansaheb MK, Helfman B, Peng L, Stecenko AA, Goldberg  
671 JB. 2016. *Staphylococcus aureus* and *Pseudomonas aeruginosa* co-infection is  
672 associated with cystic fibrosis-related diabetes and poor clinical outcomes. *Eur J*  
673 *Clin Microbiol Infect Dis* 35:947–953.
- 674 50. Serra R, Grande R, Butrico L, Rossi A, Settimo UF, Caroleo B, Amato B, Gallelli  
675 L, De Franciscis S. 2015. Chronic wound infections: The role of *Pseudomonas*  
676 *aeruginosa* and *Staphylococcus aureus*. *Expert Rev Anti Infect Ther* 13:605–613.
- 677 51. Hotterbeekx A, Kumar-Singh S, Goossens H, Malhotra-Kumar S. 2017. In vivo  
678 and In vitro interactions between *Pseudomonas aeruginosa* and *Staphylococcus*  
679 spp. *Front Cell Infect Microbiol* 7:1–13.
- 680 52. Nguyen AT, Oglesby-Sherrouse AG. 2016. Interactions between *Pseudomonas*  
681 *aeruginosa* and *Staphylococcus aureus* during co-cultivations and polymicrobial  
682 infections. *Appl Microbiol Biotechnol* 100:6141–6148.
- 683 53. Machan ZA, Pitt TL, White W, Watson D, Taylor GW, Cole PJ, Wilson R. 1991.  
684 Interaction between *Pseudomonas aeruginosa* and *Staphylococcus aureus*:  
685 Description of an anti-staphylococcal substance. *J Med Microbiol* 34:213–217.
- 686 54. Pernet E, Guillemot L, Burgel PR, Martin C, Lambeau G, Sermet-Gaudelus I,  
687 Sands D, Leduc D, Morand PC, Jeammet L, Chignard M, Wu Y, Touqui L. 2014.



- 688            *Pseudomonas aeruginosa* eradicates *Staphylococcus aureus* by manipulating the  
689            host immunity. *Nat Commun* 5:5105.
- 690    55.    Filkins LM, O'Toole GA. 2015. Cystic Fibrosis Lung Infections: Polymicrobial,  
691            Complex, and Hard to Treat. *PLoS Pathog* 11:1–8.
- 692    56.    King JM, Kulhankova K, Stach CS, Vu BG, Salgado-Pabón W. 2016. Phenotypes  
693            and Virulence among *Staphylococcus aureus* USA100, USA200, USA300,  
694            USA400, and USA600 Clonal Lineages. *mSphere* 1:1–15.
- 695    57.    Tuchscher L, Pöllath C, Siegmund A, Deinhardt-Emmer S, Hoerr V, Svensson  
696            CM, Figge MT, Monecke S, Löffler B. 2019. Clinical *S. aureus* isolates vary in  
697            their virulence to promote adaptation to the host. *Toxins (Basel)* 11.
- 698    58.    Montgomery CP, Boyle-Vavra S, Adem PV, Lee JC, Husain AN, Clasen J, Daum  
699            RS. 2008. Comparison of Virulence in Community-Associated Methicillin-  
700            Resistant *Staphylococcus aureus* Pulsotypes USA300 and USA400 in a Rat  
701            Model of Pneumonia . *J Infect Dis* 198:561–570.
- 702    59.    Diep BA, Gill SR, Chang RF, Phan TH, Chen JH, Davidson MG, Lin F, Lin J,  
703            Carleton HA, Mongodin EF, Sensabaugh GF, Perdreau-Remington F. 2006.  
704            Complete genome sequence of USA300, an epidemic clone of community-  
705            acquired methicillin-resistant *Staphylococcus aureus*. *Lancet* 367:731–739.
- 706    60.    Watkins RR, David MZ, Salata RA. 2012. Current concepts on the virulence  
707            mechanisms of methicillin-resistant *Staphylococcus aureus*. *J Med Microbiol*  
708            61:1179–1193.
- 709    61.    Joo HS, Cheung GYC, Otto M. 2011. Antimicrobial activity of community-  
710            associated methicillin-resistant *Staphylococcus aureus* is caused by phenol-

- 711 soluble modulin derivatives. *J Biol Chem* 286:8933–8940.
- 712 62. Cheung AL, Bayer AS, Zhang G, Gresham H, Xiong YQ. 2004. Regulation of  
713 virulence determinants in vitro and in vivo in *Staphylococcus aureus*. *FEMS*  
714 *Immunol Med Microbiol* 40:1–9.
- 715 63. Baldan R, Cigana C, Testa F, Bianconi I, De Simone M, Pellin D, Di Serio C,  
716 Bragonzi A, Cirillo DM. 2014. Adaptation of *Pseudomonas aeruginosa* in cystic  
717 fibrosis airways influences virulence of *Staphylococcus aureus* in vitro and murine  
718 models of co-infection. *PLoS One* 9.
- 719 64. Radlinski L, Rowe SE, Kartchner LB, Maile R, Cairns BA, Vitko NP, Gode CJ,  
720 Lachiewicz AM, Wolfgang MC, Conlon BP. 2017. *Pseudomonas aeruginosa*  
721 exoproducts determine antibiotic efficacy against *Staphylococcus aureus*. *PLoS*  
722 *Biol* 15:1–25.
- 723 65. Bernardy EE, Petit III RA, Raghuram V, Alexander AM, Read TD, Goldberg JB.  
724 2020. Genotypic and Phenotypic Diversity of *Staphylococcus aureus* Isolates from  
725 Cystic Fibrosis Patient Lung Infections and Their Interactions with *Pseudomonas*  
726 *aeruginosa*. *MBio* 11:1–18.
- 727 66. Leinweber A, Inglis FR, Kümmerli R. 2017. Cheating fosters species co-existence  
728 in well-mixed bacterial communities. *ISME J* 11:1179–1188.
- 729 67. Cornforth DM, Foster KR. 2013. Competition sensing: The social side of bacterial  
730 stress responses. *Nat Rev Microbiol*.
- 731 68. Zhang QG, Buckling A, Ellis RJ, Godfray HCJ. 2009. Coevolution between  
732 cooperators and cheats in a microbial system. *Evolution (N Y)* 63:2248–2256.
- 733 69. Valot B, Guyeux C, Rolland JY, Mazouzi K, Bertrand X, Hocquet D. 2015. What it

- 734 takes to be a *Pseudomonas aeruginosa*? The core genome of the opportunistic  
735 pathogen updated. *PLoS One* 10:1–15.
- 736 70. Wolfgang MC, Kulasekara BR, Liang X, Boyd D, Wu K, Yang Q, Miyada CG, Lory  
737 S. 2003. Conservation of genome content and virulence determinants among  
738 clinical and environmental isolates of *Pseudomonas aeruginosa*. *Proc Natl Acad*  
739 *Sci U S A* 100:8484–8489.
- 740 71. Hyun JK, Boedicker JQ, Jang WC, Ismagilov RF. 2008. Defined spatial structure  
741 stabilizes a synthetic multispecies bacterial community. *Proc Natl Acad Sci U S A*  
742 105:18188–18193.
- 743 72. Lowery NV, Ursell T. 2019. Structured environments fundamentally alter  
744 dynamics and stability of ecological communities. *Proc Natl Acad Sci U S A*  
745 116:379–388.
- 746 73. Refardt D, Bergmiller T, Kümmerli R. 2013. Altruism can evolve when relatedness  
747 is low: Evidence from bacteria committing suicide upon phage infection. *Proc R*  
748 *Soc B Biol Sci* 280.
- 749 74. Stover CK, Pham XQ, Erwin AL, Mizoguchi SD, Warrener P, Hickey MJ,  
750 Brinkman FSL, Hufnagle WO, Kowallk DJ, Lagrou M, Garber RL, Goltry L,  
751 Tolentino E, Westbrook-Wadman S, Yuan Y, Brody LL, Coulter SN, Folger KR,  
752 Kas A, Larbig K, Lim R, Smith K, Spencer D, Wong GKS, Wu Z, Paulsen IT,  
753 Relzer J, Saler MH, Hancock REW, Lory S, Olson M V. 2000. Complete genome  
754 sequence of *Pseudomonas aeruginosa* PAO1, an opportunistic pathogen. *Nature*  
755 406:959–964.
- 756 75. Choi KH, DeShazer D, Schweizer HP. 2006. mini-Tn7 insertion in bacteria with

- 757 multiple glmS-linked attTn7 sites: Example Burkholderia mallei ATCC 23344. Nat  
758 Protoc 1:162–169.
- 759 76. Rezzoagli C, Granato ET, Kümmerli R. 2019. In-vivo microscopy reveals the  
760 impact of Pseudomonas aeruginosa social interactions on host colonization. ISME  
761 J 488262.
- 762 77. Benjamini Y, Hochberg Y. 1995. Controlling the false discovery rate: a practical  
763 and powerful approach to multiple testing. J R Stat Soc Ser B 57:289–300.
- 764

765 **Table and figures**

766 **Table 1.** PA and SA strains used for this study.

| Strain name                                         | Origin                         | Description                                                         | Reference      |
|-----------------------------------------------------|--------------------------------|---------------------------------------------------------------------|----------------|
| <b><i>Pseudomonas aeruginosa</i></b><br><b>(PA)</b> |                                |                                                                     |                |
| PAO1::gfp                                           | Wound                          | Constitutive GFP expression from the chromosome (attTn7::Ptac-GFP). | Our laboratory |
| <b><i>Staphylococcus aureus</i></b><br><b>(SA)</b>  |                                |                                                                     |                |
| Cowan I                                             | Septic arthritis               | MSSA isolate. Highly invasive, but not cytotoxic. Agr-defective.    | ATCC 12598     |
| 6850                                                | Osteomyelitis                  | MSSA isolate. Highly invasive, cytotoxic and hemolytic.             | ATCC 53657     |
| JE2                                                 | Skin and soft tissue infection | USA300 CA-MRSA isolate. Highly virulent, cytotoxic and hemolytic.   | NARSA          |

767

768 CA-MRSA: Community-acquired methicillin-resistant *S. aureus*

769 MSSA: Methicillin-sensitive *S. aureus*

770 Agr: Accessory gene regulator

771

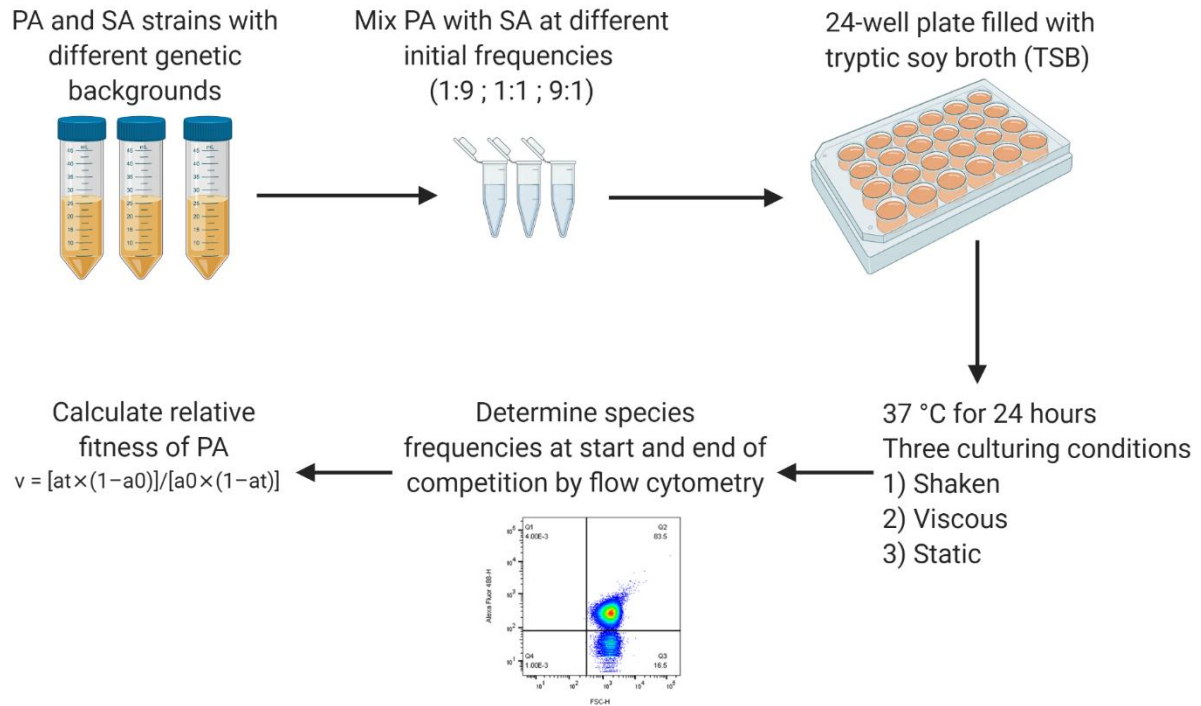

772

773 **Figure 1.** Workflow for the competition experiments. Bacterial overnight cultures were  
774 grown in 10 ml TSB in 50 ml falcon tubes for ~ 16 hours at 37 °C and 220 rpm with  
775 aeration. After washing and adjustment of OD<sub>600</sub> to obtain similar cell numbers for all  
776 strains, strain pairs (PA-Cowan I ; PA-6850 ; PA-JE2) were mixed at three different  
777 volumetric starting frequencies (1:9 ; 1:1 ; 9:1). Flow cytometry was used to measure  
778 the actual starting frequencies. Competitions were started with diluted cultures (OD<sub>600</sub> =  
779 10<sup>-5</sup>) in 24-well plates filled with 1.5 ml TSB per well. Plates were incubated for 24 hours  
780 at 37 °C under three different culturing conditions: shaken (170 rpm), viscous (170 rpm  
781 + 0.2% agar in TSB) and static. After the 24 hours competition period, final strain  
782 frequencies were measured for each replicate by flow cytometry. Using the initial and  
783 final strain frequencies, the relative fitness ( $v$ ) of the focal strain PA was calculated as  
784  $v = [a_t \times (1 - a_0)] / [a_0 \times (1 - a_t)]$ , where  $a_0$  and  $a_t$  are the initial and final frequencies of PA,  
785 respectively.

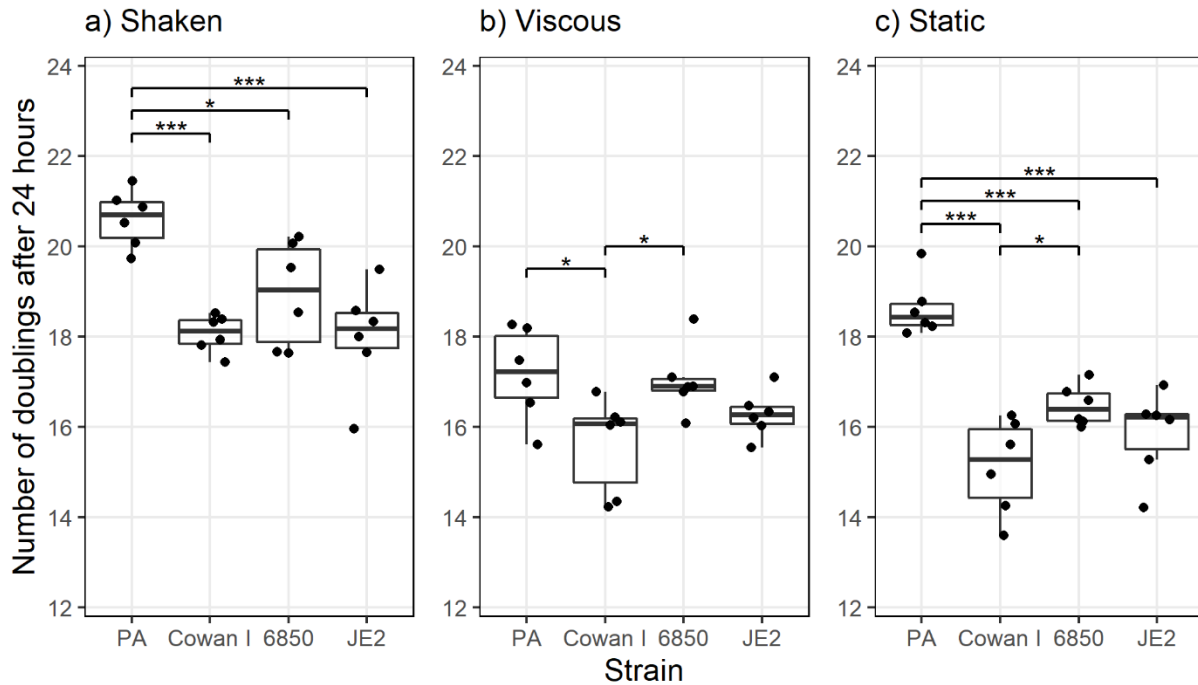

786 **Figure 2.** The number of doublings in monoculture is higher for *P. aeruginosa* PAO1  
787 (PA) than for the three *S. aureus* strains (Cowan I, 6850, JE2) under most conditions.  
788 Strains were grown as monocultures in TSB for 24 hours at 37 °C under the same  
789 conditions and using the same starting OD<sub>600</sub> as for the competition experiments. The  
790 box plots show the median (bold line) with the first and the third quartiles. The whiskers  
791 cover the 1.5\* inter-quartile range (IQR) or extend from the lowest to the highest value if  
792 they fall within the 1.5\* IQR. Data are shown from two independent experiments with  
793 three replicates each. \* p < 0.05, \*\*\* p < 0.001, pairwise comparisons without bars are  
794 all not significant.

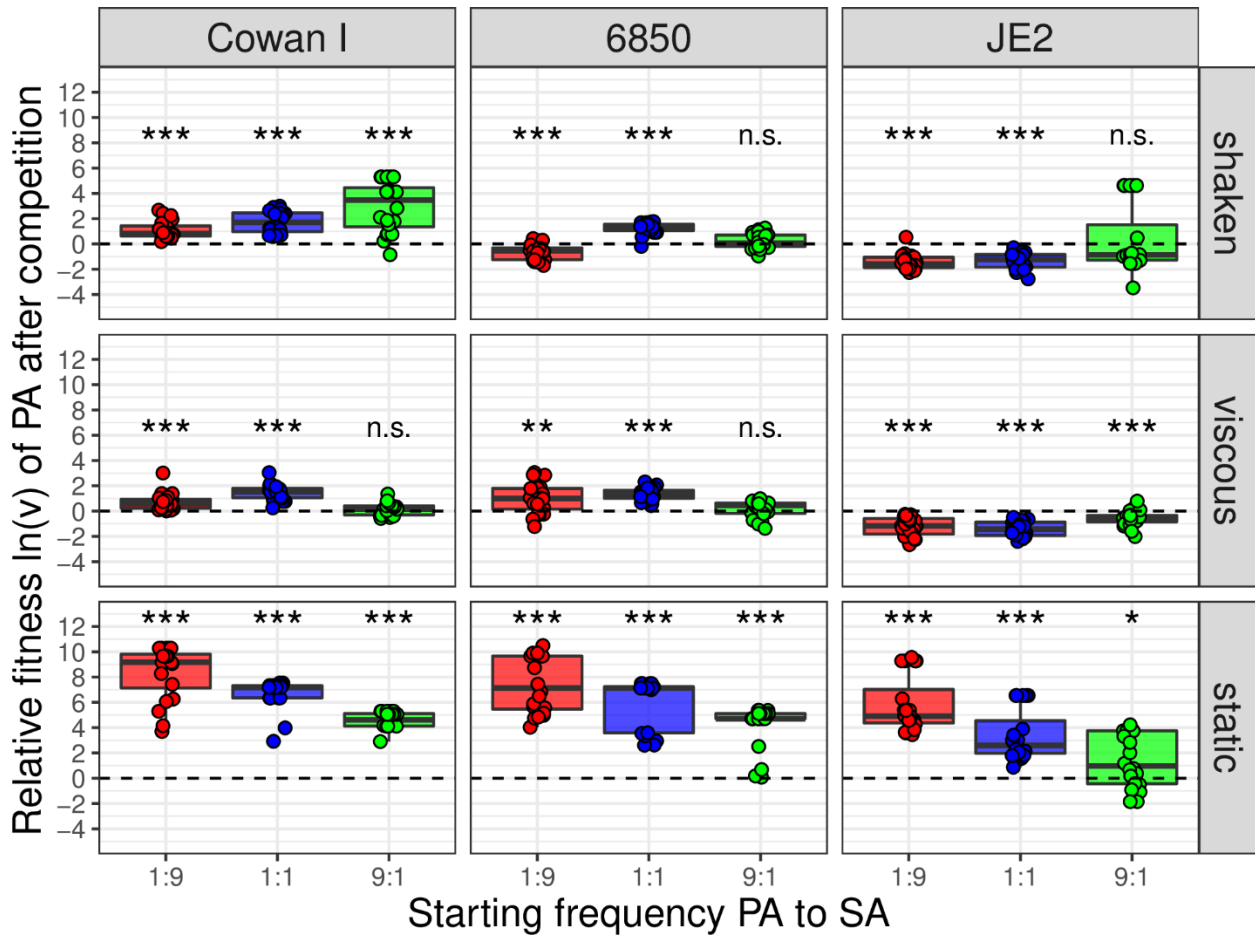

795

796 **Figure 3.** Relative fitness  $\ln(v)$  of *P. aeruginosa* PAO1 (PA) after 24-hours competitions  
797 against three different *S. aureus* (SA) strains (Cowan I, 6850, JE2) at three different  
798 starting frequencies (1:9 ; 1:1 ; 9:1) and across three different environmental conditions  
799 (shaken, viscous, static). Values of  $\ln(v) < 0$ ,  $\ln(v) > 0$ , or  $\ln(v) = 0$  (dotted line), indicate  
800 whether PA lost, won, or performed equally well in competition against the respective  
801 SA strain. The box plots show the median (bold line) with the first and third quartiles.  
802 The whiskers cover the 1.5\* inter-quartile range (IQR) or extend from the lowest to the  
803 highest value if they fall within the 1.5\* IQR. Each strain pair/culturing condition/starting  
804 frequency combination was repeated 20 times (four experiments featuring five  
805 replicates each). Asterisks indicate whether the relative fitness of PA is significantly



806 different from zero in a specific treatment (one-sample t-tests with p-values corrected for  
807 multiple comparisons using the false discovery rate method: n.s. = not significant, \*  $p <$   
808 0.05, \*\*  $p < 0.01$ , \*\*\*  $p < 0.001$ ). Detailed information on all statistical comparisons are  
809 provided in Table S3.

a) PA vs. Cowan I

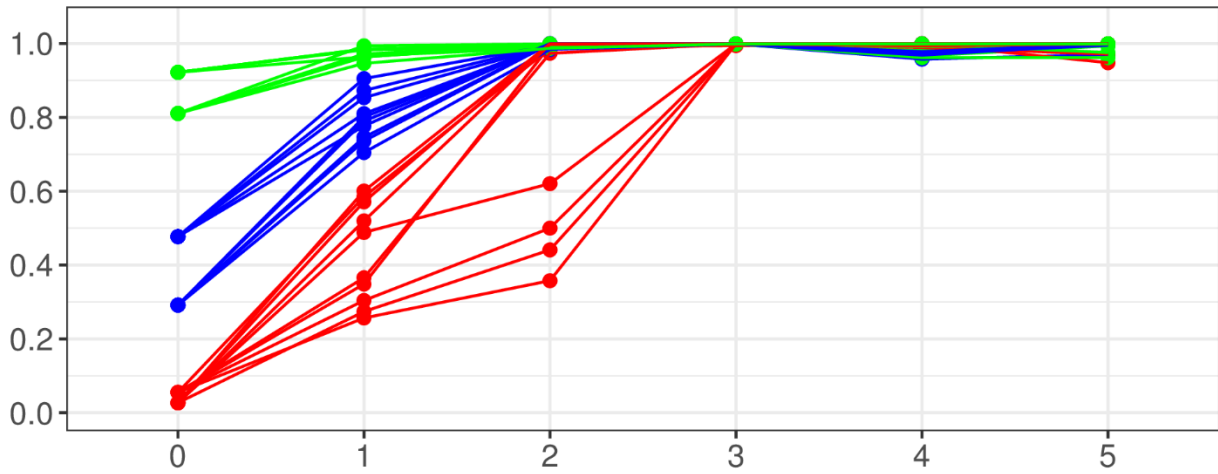

b) PA vs. 6850

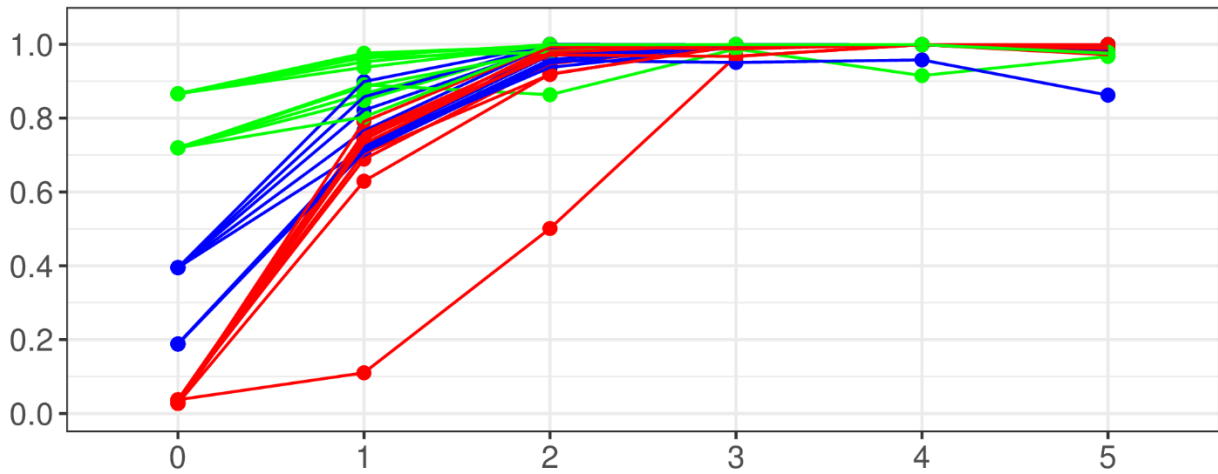

c) PA vs. JE2

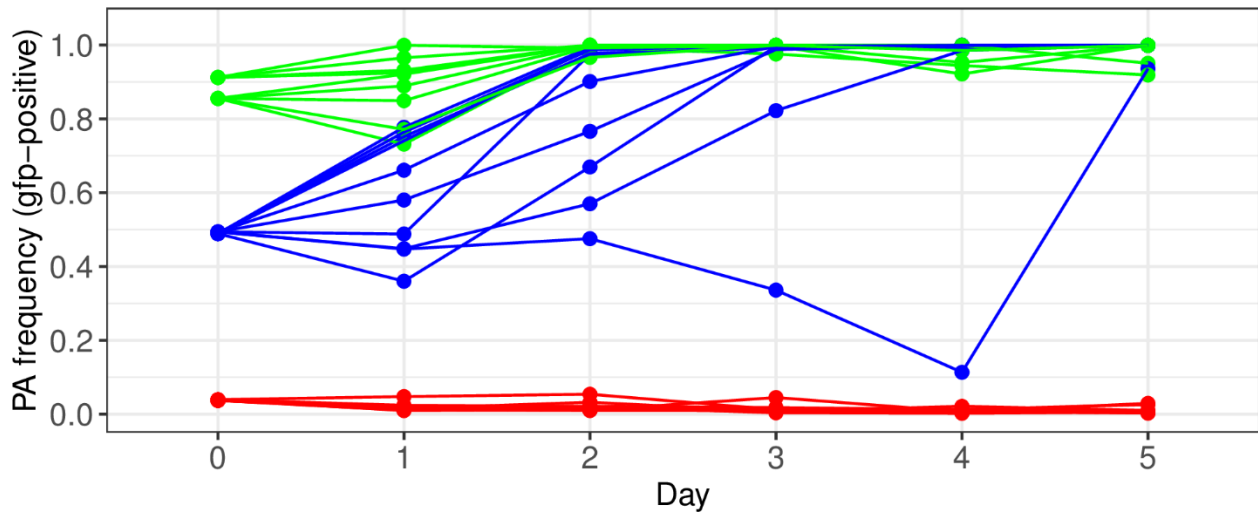

810

811 **Figure 4.** Multi-day competitive dynamics between *P. aeruginosa* PAO1 (PA) and the  
812 three *S. aureus* strains (a) Cowan I, (b) 6850 and (c) JE2 under shaken conditions.  
813 Competitions started at three volumetric starting frequencies of PA:SA (red 1:9, blue  
814 1:1, green 9:1). Community composition was followed over five days with daily transfer  
815 of diluted cultures to fresh TSB medium. Strain frequencies were assessed using flow  
816 cytometry. The experiment was carried out two times with five replicates per treatment  
817 combination and experiment.
